# Supplementary material
Source: publisher figshare collection journal article supplement (https://diabetesjournals.figshare.com/articles/dataset/_/27236181)
Supplement: Supplementary file 1 [file 1]

## Sheet: S1 Data sources
Table S1. Description and sources of phenotypes GWAS summary statistics
PHENOTYPE/POPULATION	YEAR	CONSORTIUM	AUTHOR	NCASE	NCONTROL	SAMPLE SIZE	STUDY DESIGN	COVARIATES	MRC-IEU ID	LINK	Notes
LDL-C
European	2021	GLGC	Graham S	NA	NA	<1231262	Linear mixed model (BOLT-LLM, SAIGE)	NA	NA	http://csg.sph.umich.edu/willer/public/glgc-lipids2021/results/ancestry_specific/
African / African American	2021	GLGC	Graham S	NA	NA	< 94623	Linear mixed model (BOLT-LLM, SAIGE)	NA	NA	http://csg.sph.umich.edu/willer/public/glgc-lipids2021/results/ancestry_specific/	predominantly African American
East Asian	2021	GLGC	Graham S	NA	NA	< 82587	Linear mixed model (BOLT-LLM, SAIGE)	NA	NA	http://csg.sph.umich.edu/willer/public/glgc-lipids2021/results/ancestry_specific/
South Asian	2021	GLGC	Graham S	NA	NA	< 40472	Linear mixed model (BOLT-LLM, SAIGE)	NA	NA	http://csg.sph.umich.edu/willer/public/glgc-lipids2021/results/ancestry_specific/
Hispanic	2021	GLGC	Graham S	NA	NA	< 46039	Linear mixed model (BOLT-LLM, SAIGE)	NA	NA	http://csg.sph.umich.edu/willer/public/glgc-lipids2021/results/ancestry_specific/
TYPE 2 DIABETES
European (primary analysis)	2022	DIAMANTE	Mahajan A	74124	824006	898130	Linear regresion/ linear mixed model	age, sex (where appropriate)	NA	https://t2d.hugeamp.org/dinspector.html?dataset=Mahajan2022_T2D_EU
African / African American	2019	NA	Chen J	1714	2633	4347	Linear mixed model & additive logistic regression	age, sex, BMI, principal components (as necessary)	NA	https://www.ebi.ac.uk/gwas/publications/31049640	meta-analysis in Africans from South Africa, Nigeria, Ghana, and Kenya
East Asian	2022	DIAMANTE	Mahajan A	77418	356122	433540	Linear regresion/ linear mixed model	age, sex (where appropriate)	NA	https://t2d.hugeamp.org/dinspector.html?dataset=Mahajan2022_T2D_EA
South Asian	2022	DIAMANTE	Mahajan A	16540	32952	49492	Linear regresion/ linear mixed model	age, sex (where appropriate)	NA	https://t2d.hugeamp.org/dinspector.html?dataset=Mahajan2022_T2D_SA
Hispanic	2019	NA	Wojcik GL	5971	4135	10106	Logistic mixed model regression	age at T2D 310 diagnosis, sex, study, study center (for MEC and SOL only), BMI, self-identified race/ethnicity, and first 10 311 principal components	ebi-a-GCST008048	https://gwas.mrcieu.ac.uk/datasets/ebi-a-GCST008048/	excluding individuals pregnant at blood draw, or lassified Type 1 Diabetes.; controls with glucose values greater than 7 mmol/L, or younger than 20 years of age
GLYCEMIC TRAITS
Glycated hemoglobin (HbA1c)	2021	MAGIC	Chen J				Linear regression (or linear mixed model) adjusted for BMI	age, study specific, principal components (if appropriate)		https://magicinvestigators.org/downloads/	% [where possible, studies reported HbA1c as a National Glycohemoglobin Standardization Program (NGSP) percent]
European	2021	MAGIC	Chen J	NA	NA	<146806			ebi-a-GCST90002244	MAGIC1000G_HbA1c_EUR.tsv.gz
African / African American	2021	MAGIC	Chen J	NA	NA	< 6647			ebi-a-GCST90002242	MAGIC1000G_HbA1c_AA.tsv.gz
East Asian	2021	MAGIC	Chen J	NA	NA	< 33307			ebi-a-GCST90002243	MAGIC1000G_HbA1c_EAS.tsv.gz
South Asian	2021	MAGIC	Chen J	NA	NA	< 9525			ebi-a-GCST90002246	MAGIC1000G_HbA1c_SAS.tsv.gz
Hispanic	2021	MAGIC	Chen J	NA	NA	<15248			ebi-a-GCST90002245	MAGIC1000G_HbA1c_HISP.tsv.gz
Fasting glucose (FG)	2021	MAGIC	Chen J				Linear regression (or linear mixed model) adjusted for BMI			https://magicinvestigators.org/downloads/	fasting plasma glucose (mmol/L) in whole blood corrected to plasma level
European	2021	MAGIC	Chen J	NA	NA	< 200622			ebi-a-GCST90002232	MAGIC1000G_FG_EUR.tsv.gz
African / African American	2021	MAGIC	Chen J	NA	NA	< 16579			ebi-a-GCST90002230	MAGIC1000G_FG_AA.tsv.gz
East Asian	2021	MAGIC	Chen J	NA	NA	< 35619			ebi-a-GCST90002231	MAGIC1000G_FG_EAS.tsv.gz
South Asian	2021	MAGIC	Chen J	NA	NA	< 8353			ebi-a-GCST90002234	MAGIC1000G_FG_SAS.tsv.gz
Hispanic	2021	MAGIC	Chen J	NA	NA	< 19247			ebi-a-GCST90002233	MAGIC1000G_FG_HISP.tsv.gz
Fasting insulin (FI)	2021	MAGIC	Chen J				Linear regression (or linear mixed model) adjusted for BMI			https://magicinvestigators.org/downloads/	fasting insulin concentrations (pmol/L) measured in serum
European	2021	MAGIC	Chen J	NA	NA	< 151013			ebi-a-GCST90002238	MAGIC1000G_FI_EUR.tsv.gz
African / African American	2021	MAGIC	Chen J	NA	NA	< 8101			ebi-a-GCST90002236	MAGIC1000G_FI_AA.tsv.gz
East Asian	2021	MAGIC	Chen J	NA	NA	< 35619			ebi-a-GCST90002237	MAGIC1000G_FI_EAS.tsv.gz
South Asian	2021	MAGIC	Chen J	NA	NA	< 9525			ebi-a-GCST90002240	MAGIC1000G_FI_SAS.tsv.gz
Hispanic	2021	MAGIC	Chen J	NA	NA	< 16386			ebi-a-GCST90002239	MAGIC1000G_FI_HISP.tsv.gz
Two hour glucose post-challenge (2h-glucose)	2021	MAGIC	Chen J				Linear regression (or linear mixed model) adjusted for BMI			https://magicinvestigators.org/downloads/
European	2021	MAGIC	Chen J	NA	NA	< 63396			ebi-a-GCST90002227	MAGIC1000G_2hGlu_EUR.tsv.gz
African / African American	2021	MAGIC	Chen J	NA	NA	< 1431			ebi-a-GCST90002225	MAGIC1000G_2hGlu_AA.tsv.gz
East Asian	2021	MAGIC	Chen J	NA	NA	< 8509			ebi-a-GCST90002226	MAGIC1000G_2hGlu_EAS.tsv.gz
South Asian	NA	NA	NA	NA	NA	NA	NA	NA	NA	NA	NA
Hispanic	2021	MAGIC	Chen J	NA	NA	< 12578			ebi-a-GCST90002228	MAGIC1000G_2hGlu_HISP.tsv.gz
Insulin response to glucose test
Modified Stumvoll Insulin Sensitivity Index (ISI)	2023	MAGIC	Williamson	NA	NA	55535	Inverse variance fixed-effect meta-analysis of GWAS from 28 studies.	age, sex, population structure, also study-specific covariates	NA	https://magicinvestigators.org/downloads/	Modified Stumvoll ISI (ISI) and Insulin Fold Change (IFC) were adjusted for age, sex, population structure. Covariate adjustment was performed in two steps: first modelling ISI and IFC on all covariates, then inverse normal transforming the residuals, and then modelling the inverse normally transformed residuals on the covariates again
Insulin Fold Change (IFC)	2023	MAGIC	Williamson	NA	NA	55172			NA	https://magicinvestigators.org/downloads/
Body Mass Index
European	2019	NA	Pulit SL	NA	NA	694649	Meta-analysis: UKB, GIANT, using LMM implemented with BOLT-LMM	SNP array used to genotype sample	NA	https://github.com/lindgrengroup/fatdistnGWAS	Meta-analysis: UKB, GIANT, using LMM implemented with BOLT-LMM
African / African American/ Afro Caribbean	2020	NealeLab	Pan UKB Team	NA	NA	6545	NA	NA	ukb-e-21001_AFR		UKB
East Asian	2023	NA	Chen CY	NA	NA	256450	Meta-analysis: UKB GWAS used linear regression; BBJ GWAS, linear misxed models; TWB GWAS,linear regression.	For UKB, BBJ, TWB, age, age,2 sex, age by sex interaction, age2 by sex interaction, and top 20 PCs	NA	https://www.ebi.ac.uk/gwas/studies/GCST90095034	UKB, TWB, BBJ
South Asian/ Central South Asian	2020	NealeLab	Pan UKB Team	NA	NA	8646	NA	NA	ukb-e-21001_CSA		UKB
Hispanic	2022	NA	Fernández-Rhodes L	NA	NA	56161	Meta-analysis, 27 studies/consortia from Brazil, Chile, Colombia, Mexico, Peru, or the US with self-reported heritage from across Spanish-speaking Latin America, or Native American heritage, primarily Pima and Zuni	NA	NA	https://www.ebi.ac.uk/gwas/studies/GCST90278655	27 studies/consortia from Brazil, Chile, Colombia, Mexico, Peru, or the US with self-reported heritage from across Spanish-speaking Latin America, or Native American heritage, primarily Pima and Zuni
Abbreviations:
BBJ: Biobank Japan
GLGC: Global Lipids Genetics Consortium
MAGIC: Meta-Analysis of Glucose and Insulin-related traits Consortium
DIAMANTE: Diabetes Meta-Analysis of Trans-Ethnic association studies Consortium
UKB: UK Biobank
NEALELAB: Broad Institute Neale Lab
TWB: Taiwan Biobank
GIANT: Genetic Investigation of ANthropometric Traits
HISLA:Hispanic/Latino Anthropometry Consortium
Populations:
EAS: East Asian
EUR: European
SAS/CSA: South Asian/ Central South Asian
AFR: African/ African American
HISP/HIS: Hispanic/ Latino
References:
Graham, S.E., Clarke, S.L., Wu, KH.H. et al. The power of genetic diversity in genome-wide association studies of lipids. Nature 600, 675–679 (2021).
Mahajan A, Spracklen CN, Zhang W. Multi-ancestry genetic study of type 2 diabetes highlights the power of diverse populations for discovery and translation. Nat Genet. 2022 May;54(5):560-572.
Chen J, et al. Genome-wide Association Study of Type 2 Diabetes in Africa.Diabetologia. 2019 Jul;62(7):1204-1211. doi: 10.1007/s00125-019-4880-7.
Chen J, Spracklen CN, Marenne G. Meta-Analysis of Glucose and Insulin-related Traits Consortium (MAGIC). The trans-ancestral genomic architecture of glycemic traits. Nat Genet. 2021 Jun;53(6):840-860
Ishigaki, K., Akiyama, M., Kanai, M. et al. Large-scale genome-wide association study in a Japanese population identifies novel susceptibility loci across different diseases. Nat Genet 52, 669–679 (2020).
Pulit, S. L., Stoneman, C., Morris, A. P., et al. Meta-analysis of genome-wide association studies for body fat distribution in 694 649 individuals of European ancestry. Hum Mol Gen.28(1),166–174 (2019).
Chen, C. Y., Chen, T. T., Feng, Y. A., et al. Analysis across Taiwan Biobank, Biobank Japan, and UK Biobank identifies hundreds of novel loci for 36 quantitative traits. Cell Gen. 3(12), 100436 (2023).
Fernández-Rhodes, L., Graff, M., Buchanan, V. L.,et al. Ancestral diversity improves discovery and fine-mapping of genetic loci for anthropometric traits-The Hispanic/Latino Anthropometry Consortium. HGG advances. 3(2), 100099 (2022). https://doi.org/10.1016/j.xhgg.2022.100099
Williamson, A., Norris, D.M., Yin, X. et al. Genome-wide association study and functional characterization identifies candidate genes for insulin-stimulated glucose uptake. Nat Genet 55, 973–983 (2023).
Using GWAS-VCF files:
Lyon, M., Andrews, S.J, Elsworth, B., Gaunt, T.R., Hemani, G., Marcora, E.. The variant call format provides efficient and robust storage of GWAS summary statistics. bioRxiv 2020.05.29.115824; doi: https://doi.org/10.1101/2020.05.29.115824

## Sheet: S2 Multi-ancestry instruments
Table S2. Multi-ancestry PCSK9 and HMGCR insruments constructed in ancestry-specific GWAS of LDL-C levels
			ANCESTRY	EXPOSURE TARGET	SNP	CHROMOSOME	POSITION	OTHER ALLELE	EFFECT ALLELE	SAMPLE SIZE	EFFECT ALLELE FREQUENCY	BETA	SE	PVALUE	R2	F-STATISTIC
Ancestry ID	Ancestry		AFR	HMGCR	rs12916	5	74656539	T	C	94624	0.252	0.0431428	0.00529344	3.63e-16	0.000701511	66.425
AFR	African or African-American		AFR	HMGCR	rs72633968	5	74753634	A	G	94621	0.0543	0.0751651	0.0112992	2.89e-11	0.000467462	44.2515
EAS	Eastern
EUR	European		EAS	HMGCR	rs7717415	5	74558893	A	G	82587	0.47	0.0407539	0.00517215	3.29e-15	0.000751204	62.0848
HIS	Hispanic		EAS	HMGCR	rs7708132	5	74561234	G	A	82587	0.0987	0.0556734	0.00868009	1.42e-10	0.000497874	41.1374
SAS	South Asian		EAS	HMGCR	rs6453131	5	74644706	G	T	82587	0.498	-0.0815135	0.00499499	7.22e-60	0.00321425	266.305
Exposure			EUR	HMGCR	rs375392181	5	74532691	G	T	1224044	0.0101	0.0453507	0.00706078	1.34e-10	3.37016e-05	41.2536
HMGCR	Cis-HMGCR in LDL-C		EUR	HMGCR	rs1308220	5	74537301	A	G	1179733	0.0323	0.0485528	0.00484117	1.13e-23	8.52525e-05	100.584
LDL-C	Polygenic		EUR	HMGCR	rs11741997	5	74560542	A	G	1086079	0.0195	-0.038645	0.00565145	8.03e-12	4.30513e-05	46.7591
PCSK9	Cis-PCSK9 in LDL-C		EUR	HMGCR	rs7708132	5	74561234	G	A	1231227	0.0873	0.0334366	0.00250183	9.7e-41	0.000145053	178.619
			EUR	HMGCR	rs72633961	5	74564190	A	G	1231182	0.223	0.0683452	0.0016909	1e-200	0.0013252	1633.73
			EUR	HMGCR	rs72768351	5	74582374	A	G	1224340	0.0188	-0.0400763	0.00554353	4.85e-13	4.26856e-05	52.2639
			EUR	HMGCR	rs75144964	5	74597689	C	G	1206619	0.0163	-0.0403005	0.00598945	1.71e-11	3.75198e-05	45.2737
			EUR	HMGCR	rs4703665	5	74602898	C	T	1165766	0.137	-0.0305538	0.00227243	3.27e-41	0.00015505	180.779
			EUR	HMGCR	rs35122945	5	74610293	A	C	1225333	0.0674	-0.0370552	0.00297073	1.04e-35	0.000126959	155.586
			EUR	HMGCR	rs151214061	5	74614286	T	C	1231146	0.0216	0.0428749	0.00490384	2.27e-18	6.20865e-05	76.4422
			EUR	HMGCR	rs6895057	5	74624234	G	A	1231240	0.244	0.0467067	0.00160802	1.72e-185	0.000684755	843.674
			EUR	HMGCR	rs75240579	5	74624484	C	T	1216340	0.0401	-0.0404156	0.00375722	5.51e-27	9.51193e-05	115.708
			EUR	HMGCR	rs7701925	5	74625512	G	A	1231235	0.226	0.0598467	0.00166087	1e-200	0.00105344	1298.4
			EUR	HMGCR	rs112672253	5	74628706	A	T	1224349	0.00782	0.0575641	0.00827246	3.44e-12	3.95468e-05	48.421
			EUR	HMGCR	rs17244939	5	74631096	A	C	1213368	0.0156	-0.0430266	0.00615959	2.84e-12	4.02124e-05	48.7944
			EUR	HMGCR	rs115169875	5	74633264	G	A	1201126	0.0257	-0.0336664	0.00460733	2.73e-13	4.44515e-05	53.3942
			EUR	HMGCR	rs151264833	5	74660755	C	G	1225174	0.0235	0.0339953	0.00458211	1.18e-13	4.49251e-05	55.0435
			EUR	HMGCR	rs62366588	5	74664987	C	A	1191398	0.058	-0.0345684	0.00319587	2.87e-27	9.81931e-05	116.998
			EUR	HMGCR	rs74695562	5	74675951	T	G	1228685	0.0417	-0.0369214	0.00369832	1.8e-23	8.11095e-05	99.6659
			EUR	HMGCR	rs144083983	5	74683306	C	T	1204240	0.0702	-0.0418179	0.00299336	2.37e-44	0.00016204	195.167
			EUR	HMGCR	rs181668591	5	74689045	C	T	1224380	0.0102	0.0603515	0.0072232	6.53e-17	5.70133e-05	69.8098
			EUR	HMGCR	rs114253542	5	74692810	T	C	1221643	0.00735	0.0758907	0.00865734	1.85e-18	6.2898e-05	76.8436
			EUR	HMGCR	rs180755046	5	74703989	C	A	1204905	0.0161	-0.0421176	0.00623075	1.38e-11	3.79208e-05	45.6926
			EUR	HMGCR	rs182826525	5	74719210	A	G	968732	0.0136	0.103536	0.00863082	3.73e-33	0.000148529	143.906
			EUR	HMGCR	rs151000110	5	74725216	G	A	1231140	0.0566	0.0669951	0.00310107	1.65e-103	0.000378958	466.726
			EUR	HMGCR	rs200823803	5	74753738	T	C	1066567	0.0181	0.0551325	0.00599816	3.87e-20	7.92058e-05	84.4848
			HIS	HMGCR	rs17244848	5	74643670	T	C	33988	0.127	0.0813563	0.0115878	2.21e-12	0.00144819	49.2895
			HIS	HMGCR	rs12916	5	74656539	T	C	46038	0.387	0.0743469	0.00687365	2.88e-27	0.00253473	116.985
			SAS	HMGCR	rs3846663	5	74655726	T	C	40471	0.456	-0.0600591	0.00706668	1.91e-17	0.00178159	72.228
			AFR	LDL-C	rs12117844	1	55376516	A	T	86392	0.298	-0.0352896	0.0060598	5.76e-09	0.000392404	33.913
			AFR	LDL-C	rs534142300	1	55423060	G	A	93506	0.0443	-0.134486	0.0128799	1.6e-25	0.00116462	109.023
			AFR	LDL-C	rs114654536	1	55496638	G	A	93505	0.0208	-0.199463	0.0175304	5.37e-30	0.00138263	129.459
			AFR	LDL-C	rs28362251	1	55520627	G	A	94622	0.0111	0.133902	0.0226245	3.25e-09	0.000370052	35.0273
			AFR	LDL-C	rs28362263	1	55523855	G	A	94622	0.0902	-0.243775	0.00845251	6.66e-183	0.00871393	831.759
			AFR	LDL-C	rs9436515	1	56120519	C	T	94622	0.486	-0.0355485	0.00493144	5.66e-13	0.000548864	51.962
			AFR	LDL-C	rs77737777	1	56287738	G	A	93507	0.0167	-0.186425	0.020361	5.39e-20	0.000895729	83.8303
			AFR	LDL-C	rs12239737	1	63086001	T	A	94622	0.36	-0.0461765	0.00506626	7.9e-20	0.00087719	83.0726
			AFR	LDL-C	rs114138180	1	93168083	C	T	94622	0.0613	0.103744	0.00977195	2.5e-26	0.00118975	112.708
			AFR	LDL-C	rs12740374	1	109817590	G	T	94622	0.255	-0.155286	0.00531359	9.52e-188	0.00894528	854.042
			AFR	LDL-C	rs6657944	1	220951135	T	C	94622	0.49	0.0253826	0.00463205	4.26e-08	0.000317246	30.0273
			AFR	LDL-C	rs11576986	1	234728198	A	G	94620	0.337	0.0349724	0.00504304	4.07e-12	0.000507998	48.0902
			AFR	LDL-C	rs60220193	2	21094380	G	A	94622	0.0491	-0.0748801	0.0109613	8.41e-12	0.00049295	46.6659
			AFR	LDL-C	rs62120852	2	21213544	C	T	94622	0.0584	0.0723314	0.0100806	7.21e-13	0.000543817	51.4839
			AFR	LDL-C	rs1801702	2	21225485	C	G	94623	0.105	-0.0960153	0.00753836	3.69e-37	0.00171154	162.225
			AFR	LDL-C	rs1712248	2	21385778	G	C	94621	0.49	-0.0837243	0.00477037	5.85e-69	0.00324489	308.028
			AFR	LDL-C	rs4665376	2	27509032	C	T	94623	0.203	0.0403536	0.00589997	7.94e-12	0.000494144	46.7795
			AFR	LDL-C	rs4245791	2	44074431	T	C	94621	0.13	0.0805966	0.00684874	5.7e-32	0.00146147	138.485
			AFR	LDL-C	rs17029617	3	32541553	G	A	94622	0.28	-0.0299009	0.00518278	7.96e-09	0.00035164	33.2839
			AFR	LDL-C	rs370878539	4	69373842	T	G	75726	0.209	-0.0488842	0.0088272	3.06e-08	0.000404828	30.6676
			AFR	LDL-C	rs12916	5	74656539	T	C	94624	0.252	0.0431428	0.00529344	3.63e-16	0.000701511	66.425
			AFR	LDL-C	rs12517431	5	156392248	C	T	93347	0.448	0.0428924	0.00470201	7.37e-20	0.000890648	83.2117
			AFR	LDL-C	rs75143493	6	160946747	T	G	93506	0.0164	0.163987	0.0195063	4.21e-17	0.000755269	70.674
			AFR	LDL-C	rs190068306	6	160986280	G	A	93507	0.0254	0.195932	0.0158877	6.07e-35	0.00162382	152.083
			AFR	LDL-C	rs112082645	7	1040081	C	T	92261	0.129	-0.0398258	0.00721335	3.37e-08	0.000330288	30.4821
			AFR	LDL-C	rs192361639	7	25991022	G	T	84889	0.477	0.037583	0.00510139	1.74e-13	0.000638965	54.2745
			AFR	LDL-C	rs17725246	7	44581986	T	C	84810	0.25	0.0356559	0.00592155	1.73e-09	0.000427326	36.2562
			AFR	LDL-C	rs148122493	7	45102160	A	C	93505	0.0084	-0.173297	0.0310127	2.3e-08	0.000333828	31.2244
			AFR	LDL-C	rs3735018	7	137562744	G	C	94624	0.103	-0.0809839	0.00817322	3.83e-23	0.00103648	98.1752
			AFR	LDL-C	rs4841132	8	9183596	G	A	94622	0.118	-0.0662924	0.00720751	3.66e-20	0.000893258	84.5956
			AFR	LDL-C	rs3808607	8	59412924	G	T	94621	0.413	0.0274869	0.00466604	3.84e-09	0.000366613	34.7013
			AFR	LDL-C	rs3780181	9	2640759	A	G	94622	0.208	-0.039526	0.00587568	1.73e-11	0.000478024	45.2523
			AFR	LDL-C	rs77877520	9	107543513	A	G	93507	0.028	0.0959883	0.0154901	5.76e-10	0.000410493	38.3989
			AFR	LDL-C	rs11506820	9	108171763	C	T	94623	0.257	0.0307446	0.00548186	2.04e-08	0.000332308	31.4538
			AFR	LDL-C	rs635634	9	136155000	C	T	94624	0.105	0.0652277	0.0075013	3.45e-18	0.000798441	75.6105
			AFR	LDL-C	rs33930165	11	5248233	C	T	91818	0.0167	-0.115197	0.020772	2.93e-08	0.000334852	30.755
			AFR	LDL-C	rs11170385	12	53443278	T	G	94622	0.126	-0.043583	0.00708353	7.62e-10	0.000399916	37.8552
			AFR	LDL-C	rs10846742	12	125308682	A	G	94622	0.47	0.0325128	0.00503196	1.04e-10	0.000441012	41.747
			AFR	LDL-C	rs151330264	13	32988865	A	T	93506	0.0286	0.117572	0.0147457	1.54e-15	0.000679426	63.5723
			AFR	LDL-C	rs247616	16	56989590	C	T	93765	0.258	-0.0351907	0.00531242	3.49e-11	0.000467764	43.8795
			AFR	LDL-C	rs55963712	16	70332593	G	C	94621	0.314	0.0283625	0.0050672	2.18e-08	0.000330995	31.3288
			AFR	LDL-C	rs5471	16	72088461	A	C	93505	0.105	0.163536	0.00841474	3.94e-84	0.00402309	377.69
			AFR	LDL-C	rs73339979	17	4693902	G	C	85533	0.183	-0.046314	0.00649846	1.03e-12	0.000593488	50.7918
			AFR	LDL-C	rs8078686	17	45735706	T	C	94622	0.405	-0.032089	0.00483553	3.22e-11	0.00046519	44.0367
			AFR	LDL-C	rs112299992	17	67133420	G	A	93507	0.0482	-0.0703542	0.0113712	6.13e-10	0.000409209	38.2788
			AFR	LDL-C	rs144826254	19	11187358	T	G	93764	0.106	-0.238111	0.00776377	1e-200	0.00993213	940.599
			AFR	LDL-C	rs17249225	19	11213039	G	A	92260	0.00758	-0.178986	0.0278477	1.3e-10	0.00044756	41.3095
			AFR	LDL-C	rs17248840	19	11225345	C	G	93764	0.178	0.0852161	0.00631686	1.78e-41	0.00193715	181.983
			AFR	LDL-C	rs371179638	19	11237035	A	G	93764	0.0111	-0.232936	0.0241834	5.85e-22	0.000988491	92.7746
			AFR	LDL-C	rs76204556	19	11393335	C	T	93765	0.0432	-0.136051	0.0119147	3.37e-30	0.00138865	130.385
			AFR	LDL-C	rs549667629	19	45288228	T	G	91145	0.00984	-0.254336	0.0276083	3.19e-20	0.000930249	84.8646
			AFR	LDL-C	rs142527337	19	45302892	G	A	92649	0.0201	-0.275069	0.0180309	1.52e-52	0.00250564	232.723
			AFR	LDL-C	rs10408744	19	45340507	T	C	92647	0.012	-0.153828	0.0218669	2e-12	0.000533867	49.4865
			AFR	LDL-C	rs7254892	19	45389596	G	A	93765	0.126	-0.298829	0.00768202	1e-200	0.0158819	1513.16
			AFR	LDL-C	rs112019714	19	45404857	T	C	93764	0.0563	0.194742	0.01061	3.03e-75	0.0035801	336.883
			AFR	LDL-C	rs2239375	19	45459851	C	T	94622	0.384	0.0369948	0.00484266	2.18e-14	0.000616387	58.3585
			AFR	LDL-C	rs6029616	20	39928506	T	G	93119	0.244	-0.0370476	0.00559455	3.54e-11	0.000470703	43.8511
			EAS	LDL-C	rs10903130	1	25769221	A	T	82587	0.299	0.0306309	0.00544258	1.82e-08	0.000383382	31.6737
			EAS	LDL-C	rs151193009	1	55509585	C	T	50235	0.00889	-0.485976	0.0333242	3.59e-48	0.00421569	212.663
			EAS	LDL-C	rs72911441	1	55552273	A	G	82587	0.0536	0.0773407	0.0111057	3.31e-12	0.000586891	48.4969
			EAS	LDL-C	rs6663252	1	55630151	T	C	82587	0.12	-0.0750854	0.00781761	7.64e-22	0.00111575	92.247
			EAS	LDL-C	rs602633	1	109821511	G	T	74713	0.0662	-0.191937	0.0104465	2.15e-75	0.00449802	337.57
			EAS	LDL-C	rs2642438	1	220970028	G	A	79693	0.177	-0.0509314	0.00682698	8.63e-14	0.000697896	55.6549
			EAS	LDL-C	rs11320208	1	234850422	C	A	82587	0.256	-0.0401914	0.00569605	1.71e-12	0.000602484	49.7861
			EAS	LDL-C	rs13306194	2	21252534	G	A	82587	0.114	-0.123476	0.00789169	3.52e-55	0.00295548	244.802
			EAS	LDL-C	rs62133263	2	21374231	G	C	82587	0.0759	0.0696487	0.00948717	2.11e-13	0.000652165	53.8942
			EAS	LDL-C	rs2539981	2	63104904	C	T	80585	0.328	-0.0373092	0.00549177	1.09e-11	0.000572406	46.1526
			EAS	LDL-C	rs6741916	2	158419968	A	T	69649	0.271	-0.0413621	0.00632719	6.27e-11	0.0006132	42.7337
			EAS	LDL-C	rs3752442	4	3446883	A	G	76715	0.453	-0.0329721	0.00539316	9.74e-10	0.000486984	37.3762
			EAS	LDL-C	rs6453131	5	74644706	G	T	82587	0.498	-0.0815135	0.00499499	7.22e-60	0.00321425	266.305
			EAS	LDL-C	rs6874202	5	156391628	C	T	82587	0.253	-0.055733	0.00577362	4.77e-22	0.00112701	93.179
			EAS	LDL-C	rs9274662	6	32636494	C	T	64354	0.167	0.0474446	0.00838706	1.54e-08	0.000497007	31.9993
			EAS	LDL-C	rs9376090	6	135411228	T	C	79693	0.28	-0.0398318	0.00572361	3.42e-12	0.000607345	48.4294
			EAS	LDL-C	rs73596816	6	161017363	G	A	79651	0.0321	0.115993	0.0140668	1.64e-16	0.000852926	67.9927
			EAS	LDL-C	rs181711349	6	161108293	C	A	56213	0.00312	0.368891	0.0505908	3.06e-13	0.000944943	53.1664
			EAS	LDL-C	rs7789194	7	25992510	C	T	71150	0.421	0.0430259	0.00553265	7.44e-15	0.000849278	60.4758
			EAS	LDL-C	rs2054345	8	9199305	T	C	78287	0.0119	-0.13521	0.0236376	1.06e-08	0.000417772	32.719
			EAS	LDL-C	rs112784971	8	59406490	C	T	82587	0.244	-0.0363325	0.00585445	5.44e-10	0.000466127	38.513
			EAS	LDL-C	rs2737265	8	116667634	A	G	82587	0.299	-0.0300141	0.00541567	2.99e-08	0.000371769	30.714
			EAS	LDL-C	rs2954027	8	126485294	A	T	81098	0.451	0.043207	0.00507648	1.72e-17	0.000892452	72.439
			EAS	LDL-C	rs1883025	9	107664301	C	T	82587	0.234	-0.0397131	0.00587971	1.44e-11	0.000552083	45.6189
			EAS	LDL-C	rs59857465	9	130719709	G	A	78713	0.0763	0.0563161	0.00981948	9.74e-09	0.000417696	32.891
			EAS	LDL-C	rs2519093	9	136141870	C	T	82587	0.216	0.0860428	0.00601942	2.38e-46	0.00246794	204.319
			EAS	LDL-C	rs7898735	10	74712546	T	C	82587	0.238	-0.0577887	0.00613392	4.46e-21	0.00107357	88.7563
			EAS	LDL-C	rs2419607	10	113978499	T	G	82587	0.403	-0.0366065	0.00515723	1.26e-12	0.000609687	50.3817
			EAS	LDL-C	rs11601507	11	5701074	C	A	79693	0.0843	0.059695	0.00926713	1.18e-10	0.000520402	41.493
			EAS	LDL-C	rs174559	11	61581656	G	A	75345	0.41	-0.03583	0.00560173	1.59e-10	0.000542699	40.9108
			EAS	LDL-C	rs59379014	11	126228000	C	T	79693	0.0938	0.053765	0.00880887	1.04e-09	0.000467235	37.2519
			EAS	LDL-C	rs12229026	12	100834253	T	C	82587	0.282	0.0346885	0.00571189	1.26e-09	0.000446381	36.8808
			EAS	LDL-C	rs4646776	12	112230019	G	C	82587	0.195	0.0390328	0.0064417	1.37e-09	0.000444379	36.7154
			EAS	LDL-C	rs11571836	13	32973439	A	G	82587	0.376	-0.0429132	0.00524273	2.72e-16	0.000810593	66.9971
			EAS	LDL-C	rs7140110	13	114544024	T	C	65211	0.217	0.0429736	0.00673697	1.79e-10	0.000623566	40.6875
			EAS	LDL-C	rs6493583	15	53096084	C	G	79693	0.174	-0.0409784	0.00694324	3.59e-09	0.000436894	34.8317
			EAS	LDL-C	rs77303550	16	72079657	C	T	72451	0.244	-0.0895249	0.00639594	1.62e-44	0.00269688	195.915
			EAS	LDL-C	rs7212349	17	26733698	C	T	80585	0.274	-0.0340342	0.0057522	3.28e-09	0.00043423	35.0068
			EAS	LDL-C	rs62074055	17	45771933	G	C	82587	0.332	0.0381562	0.00548377	3.45e-12	0.000585876	48.4129
			EAS	LDL-C	rs12162136	17	67082266	A	G	82587	0.4	0.0340923	0.00509051	2.12e-11	0.000542803	44.8518
			EAS	LDL-C	rs2738464	19	11242307	C	G	73064	0.283	-0.10797	0.00594468	1.02e-73	0.00449458	329.866
			EAS	LDL-C	rs737337	19	11347493	T	C	79693	0.265	-0.0618843	0.00586456	4.96e-26	0.00139529	111.347
			EAS	LDL-C	rs406315	19	45384116	A	G	76917	0.073	-0.360049	0.0103814	1e-200	0.0153975	1202.82
			EAS	LDL-C	rs157592	19	45424514	A	C	73821	0.0931	0.116394	0.0100168	3.27e-31	0.0018257	135.018
			EAS	LDL-C	rs187976859	19	45533628	A	C	58919	0.0053	-0.305238	0.0399755	2.25e-14	0.000988563	58.3008
			EAS	LDL-C	rs5758600	22	42538670	G	T	78410	0.433	0.0439292	0.00567779	1.02e-14	0.00076286	59.86
			EUR	LDL-C	rs1123571	1	2326009	G	A	1196667	0.469	-0.0109643	0.00142323	1.32e-14	4.95926e-05	59.3487
			EUR	LDL-C	rs1497406	1	16505320	G	A	1225533	0.416	-0.0136287	0.00141025	4.29e-22	7.62006e-05	93.3933
			EUR	LDL-C	rs10753556	1	23732762	G	A	1228501	0.126	-0.0122229	0.00209345	5.26e-09	2.77483e-05	34.0897
			EUR	LDL-C	rs10903129	1	25768937	G	A	1231258	0.452	-0.0258481	0.00138909	2.77e-77	0.000281142	346.255
			EUR	LDL-C	rs12094989	1	26848386	C	T	1225752	0.215	-0.0129269	0.00169858	2.73e-14	4.72491e-05	57.9183
			EUR	LDL-C	rs114165349	1	27021913	G	C	1231042	0.0233	0.0835384	0.00462313	5.53e-73	0.000265162	326.512
			EUR	LDL-C	rs638769	1	42647030	C	G	1231009	0.293	-0.0084347	0.0015297	3.51e-08	2.46976e-05	30.4037
			EUR	LDL-C	rs11811656	1	45384332	G	T	1231235	0.239	-0.0111634	0.00164396	1.12e-11	3.74501e-05	46.1116
			EUR	LDL-C	rs12409233	1	55436599	G	C	1228324	0.0882	-0.0225537	0.00244129	2.5e-20	6.9479e-05	85.3485
			EUR	LDL-C	rs12732125	1	55470153	C	T	1225220	0.0188	-0.173907	0.00524615	1e-200	0.000896085	1098.88
			EUR	LDL-C	rs11206506	1	55485919	G	C	1227742	0.143	0.0351448	0.00197791	1.24e-70	0.000257093	315.725
			EUR	LDL-C	rs2479413	1	55518682	C	T	1172094	0.349	-0.0500808	0.00154721	1e-200	0.000893086	1047.72
			EUR	LDL-C	rs11206517	1	55526428	T	G	1231228	0.0371	0.0888589	0.00371072	1e-126	0.000465527	573.436
			EUR	LDL-C	rs12086676	1	55738663	C	T	1231261	0.173	-0.0267941	0.00184307	6.98e-48	0.000171621	211.346
			EUR	LDL-C	rs6588577	1	56322645	C	A	1221449	0.0658	-0.0218927	0.00281389	7.24e-15	4.9555e-05	60.5318
			EUR	LDL-C	rs7534572	1	62999675	G	C	1188410	0.329	-0.0428825	0.00154102	2.03e-170	0.00065117	774.36
			EUR	LDL-C	rs6684364	1	78574129	G	A	1231229	0.247	-0.0095788	0.00161878	3.27e-09	2.84378e-05	35.0143
			EUR	LDL-C	rs2391159	1	92971951	C	T	1231220	0.207	-0.0234181	0.00171891	2.89e-42	0.000150729	185.608
			EUR	LDL-C	rs4970824	1	109715950	G	A	1231262	0.0695	-0.089795	0.00275232	1e-200	0.000863735	1064.4
			EUR	LDL-C	rs189974330	1	109729937	G	A	1214729	0.00801	0.0454574	0.00811032	2.08e-08	2.58608e-05	31.4147
			EUR	LDL-C	rs114713488	1	109751285	A	C	1231178	0.0279	0.0379006	0.00419812	1.75e-19	6.61962e-05	81.5045
			EUR	LDL-C	rs149841512	1	109796865	G	A	1228403	0.0221	0.0408929	0.00501087	3.33e-16	5.42132e-05	66.5992
			EUR	LDL-C	rs79868705	1	109815074	G	A	1231181	0.0398	-0.109229	0.00354924	1e-200	0.000768687	947.119
			EUR	LDL-C	rs17036094	1	109834940	A	C	1227694	0.0117	-0.114341	0.00641661	4.99e-71	0.000258577	317.535
			EUR	LDL-C	rs148631275	1	109927624	T	C	1227120	0.0177	0.0336814	0.00545881	6.82e-10	3.1023e-05	38.0701
			EUR	LDL-C	rs10858093	1	109949756	C	T	1219627	0.0265	0.0443277	0.00473215	7.44e-21	7.19408e-05	87.7471
			EUR	LDL-C	rs149516707	1	109991601	C	G	1223265	0.0201	-0.0460811	0.00518182	5.96e-19	6.46446e-05	79.0825
			EUR	LDL-C	rs115458560	1	110061974	T	C	1224109	0.0156	-0.0492575	0.005885	5.76e-17	5.72278e-05	70.0569
			EUR	LDL-C	rs267733	1	150958836	A	G	1230294	0.156	-0.0187116	0.00190325	8.25e-23	7.85574e-05	96.6561
			EUR	LDL-C	rs113462784	1	154044453	T	C	1048360	0.119	0.0146369	0.0026158	2.2e-08	2.98652e-05	31.3104
			EUR	LDL-C	rs4390169	1	155106054	G	A	1230454	0.485	0.0119697	0.00138496	5.49e-18	6.07016e-05	74.695
			EUR	LDL-C	rs115383270	1	161531340	G	A	1191572	0.0734	0.0193347	0.00274973	2.04e-12	4.14912e-05	49.4418
			EUR	LDL-C	rs6665535	1	174491618	A	G	1231248	0.24	0.00952109	0.00165198	8.24e-09	2.69778e-05	33.2172
			EUR	LDL-C	rs6682862	1	177938437	G	A	1231260	0.164	-0.0137009	0.00188331	3.47e-13	4.2982e-05	52.9241
			EUR	LDL-C	rs1689801	1	182165484	G	A	1230440	0.325	0.0144266	0.00147894	1.76e-22	7.73273e-05	95.1538
			EUR	LDL-C	rs2296288	1	183072590	C	T	1230426	0.437	-0.0113161	0.00140604	8.4e-16	5.26405e-05	64.7735
			EUR	LDL-C	rs1434282	1	199010721	T	C	1220646	0.277	-0.0109297	0.00157384	3.8e-12	3.95083e-05	48.2275
			EUR	LDL-C	rs2642438	1	220970028	G	A	1218032	0.294	-0.0268921	0.00152599	1.65e-69	0.000254904	310.56
			EUR	LDL-C	rs12138866	1	224432260	A	G	1201419	0.0396	-0.0240069	0.00365594	5.15e-11	3.58892e-05	43.1195
			EUR	LDL-C	rs7544869	1	234734290	T	A	1217975	0.453	-0.0122329	0.00141112	4.36e-18	6.16972e-05	75.1502
			EUR	LDL-C	rs553427	1	234852760	T	C	1227838	0.473	-0.0403134	0.00140727	1.77e-180	0.000667902	820.622
			EUR	LDL-C	rs10910522	1	235011725	G	A	1197955	0.429	-0.0119292	0.00142231	4.98e-17	5.87176e-05	70.345
			EUR	LDL-C	rs7512010	1	235111050	T	A	1198346	0.193	-0.0182638	0.00179491	2.56e-24	8.63927e-05	103.537
			EUR	LDL-C	rs3935011	1	246891269	T	C	1225699	0.48	0.00893719	0.00140019	1.74e-10	3.32376e-05	40.7406
			EUR	LDL-C	rs3820897	2	3642361	C	T	1214850	0.192	0.0159195	0.00176923	2.3e-19	6.66406e-05	80.9635
			EUR	LDL-C	rs67269656	2	8720038	C	T	1225533	0.265	-0.0103803	0.00157377	4.23e-11	3.54974e-05	43.5047
			EUR	LDL-C	rs6734686	2	20432081	T	C	1218765	0.21	0.0150323	0.0017352	4.59e-18	6.15751e-05	75.0501
			EUR	LDL-C	rs141481562	2	20861608	A	G	1106595	0.00656	0.0739245	0.00961434	1.48e-14	5.34227e-05	59.1204
			EUR	LDL-C	rs75980706	2	21076799	G	T	1210302	0.0188	-0.0359561	0.00528501	1.02e-11	3.82422e-05	46.2863
			EUR	LDL-C	rs11096689	2	21140540	T	C	1231262	0.292	0.049547	0.00152922	1e-200	0.000851872	1049.77
			EUR	LDL-C	rs35239705	2	21451687	G	A	1231262	0.192	-0.0634174	0.00181215	1e-200	0.00099368	1224.69
			EUR	LDL-C	rs4665972	2	27598097	C	T	1218799	0.393	0.0300431	0.00145833	2.69e-94	0.000348092	424.402
			EUR	LDL-C	rs7599046	2	43238381	C	A	1221407	0.0496	-0.018004	0.00328702	4.32e-08	2.45619e-05	30.0008
			EUR	LDL-C	rs10495907	2	43998726	G	A	1231260	0.138	0.030892	0.00201777	6.56e-53	0.000190334	234.395
			EUR	LDL-C	rs56266464	2	44054991	G	A	1231249	0.0615	-0.113748	0.00290807	1e-200	0.00124106	1529.95
			EUR	LDL-C	rs191243200	2	44090361	G	A	1224464	0.0124	0.0659497	0.0063515	2.95e-25	8.80418e-05	107.813
			EUR	LDL-C	rs35206901	2	44097360	A	G	1231244	0.185	-0.0390528	0.00177995	1.07e-106	0.000390818	481.38
			EUR	LDL-C	rs17425376	2	44327351	C	T	1231210	0.104	0.0149335	0.0022689	4.65e-11	3.5184e-05	43.3203
			EUR	LDL-C	rs4671050	2	62988169	G	T	1230373	0.32	-0.0223969	0.0015036	3.52e-50	0.0001803	221.876
			EUR	LDL-C	rs954680	2	64913045	G	C	1220562	0.298	-0.0123572	0.0015382	9.47e-16	5.28727e-05	64.5378
			EUR	LDL-C	rs11887443	2	85879041	G	T	1073701	0.263	-0.0124671	0.00175824	1.33e-12	4.68243e-05	50.2775
			EUR	LDL-C	rs2970902	2	88429183	G	C	1231236	0.342	0.0101195	0.00147386	6.6e-12	3.82867e-05	47.1417
			EUR	LDL-C	rs113313551	2	101662338	C	G	1231157	0.148	-0.0127	0.00195157	7.64e-11	3.43962e-05	42.3485
			EUR	LDL-C	rs1992172	2	109093836	A	G	1231261	0.194	0.019503	0.00175889	1.43e-28	9.98463e-05	122.949
			EUR	LDL-C	rs150474434	2	118845121	G	A	1231176	0.0949	-0.0423421	0.00238341	1.31e-70	0.000256281	315.607
			EUR	LDL-C	rs17050272	2	121306440	G	A	1186453	0.421	-0.0228383	0.00144725	4.24e-56	0.000209845	249.023
			EUR	LDL-C	rs1375131	2	135954797	T	C	1087254	0.313	0.0195868	0.00172675	8.02e-30	0.000118327	128.667
			EUR	LDL-C	rs13011344	2	144186545	T	G	1231254	0.236	0.00969097	0.00163248	2.91e-09	2.86206e-05	35.2402
			EUR	LDL-C	rs12614487	2	158434569	C	T	1231256	0.074	-0.026633	0.0026376	5.67e-24	8.28015e-05	101.958
			EUR	LDL-C	rs10184004	2	165508389	C	T	1231171	0.413	-0.0104874	0.00140997	1.02e-13	4.49343e-05	55.3242
			EUR	LDL-C	rs10184673	2	169827796	A	G	1231166	0.405	0.0220445	0.00142603	6.6e-54	0.000194063	238.97
			EUR	LDL-C	rs12693968	2	203302627	G	A	1230421	0.258	0.0212882	0.00159951	2.05e-40	0.000143942	177.135
			EUR	LDL-C	rs3814365	2	204305093	C	T	1222209	0.443	-0.0137336	0.00141565	2.98e-22	7.69978e-05	94.1144
			EUR	LDL-C	rs1250259	2	216300482	A	T	1230449	0.264	-0.0176512	0.00159409	1.7e-28	9.96359e-05	122.609
			EUR	LDL-C	rs2382818	2	219155907	A	T	1217906	0.41	0.00825349	0.00143144	8.12e-09	2.72963e-05	33.2451
			EUR	LDL-C	rs78058190	2	219699999	G	A	1199803	0.0524	0.0239644	0.00360947	3.15e-11	3.67384e-05	44.0804
			EUR	LDL-C	rs6431630	2	234677386	G	A	1230429	0.105	0.0241194	0.00225665	1.16e-26	9.28341e-05	114.236
			EUR	LDL-C	rs146194062	3	12271911	C	T	1068321	0.0117	-0.0701631	0.00704105	2.17e-23	9.29395e-05	99.2983
			EUR	LDL-C	rs13076933	3	12327431	T	G	1231121	0.257	-0.0245071	0.00159894	5.04e-53	0.000190781	234.919
			EUR	LDL-C	rs6792725	3	24520283	G	A	1212395	0.319	0.015304	0.00156248	1.19e-22	7.9123e-05	95.9357
			EUR	LDL-C	rs9837622	3	32514647	T	A	1231252	0.073	-0.0370846	0.00270523	9.03e-43	0.000152604	187.922
			EUR	LDL-C	rs2526385	3	50181135	G	T	1209413	0.188	-0.00995484	0.00178991	2.67e-08	2.55753e-05	30.9318
			EUR	LDL-C	rs71311871	3	58420613	A	G	1231258	0.0814	-0.0379602	0.00252076	3.01e-51	0.000184147	226.774
			EUR	LDL-C	rs55921103	3	69810294	T	G	1218788	0.359	-0.0126185	0.00147847	1.4e-17	5.97635e-05	72.8433
			EUR	LDL-C	rs7637250	3	100445155	C	G	1218838	0.343	0.00893913	0.00150183	2.65e-09	2.90663e-05	35.4281
			EUR	LDL-C	rs9837149	3	122230845	G	C	1231260	0.153	0.0188877	0.0019215	8.39e-23	7.84682e-05	96.6221
			EUR	LDL-C	rs11719535	3	125087678	T	C	1221436	0.244	-0.0118243	0.00163478	4.73e-13	4.28295e-05	52.3156
			EUR	LDL-C	rs2594205	3	127254061	G	A	1218730	0.122	0.012694	0.00215727	4e-09	2.84098e-05	34.6248
			EUR	LDL-C	rs55732372	3	129314270	G	A	1228552	0.0758	0.0173547	0.0026697	8e-11	3.43954e-05	42.258
			EUR	LDL-C	rs74341202	3	132183991	G	A	1220569	0.0497	-0.0425579	0.00322656	1e-39	0.000142514	173.972
			EUR	LDL-C	rs523118	3	135965888	G	T	1218799	0.211	-0.0144134	0.00177081	3.97e-16	5.43542e-05	66.2504
			EUR	LDL-C	rs9653945	3	142660706	G	A	1231249	0.347	-0.012963	0.00145387	4.83e-19	6.45633e-05	79.4985
			EUR	LDL-C	rs6441313	3	160036400	G	A	1221451	0.463	0.0125638	0.00141675	7.44e-19	6.43801e-05	78.6421
			EUR	LDL-C	rs56118251	3	171534525	A	G	1231243	0.157	0.0136844	0.00188919	4.37e-13	4.26126e-05	52.4686
			EUR	LDL-C	rs16861497	3	186731327	G	T	1218641	0.392	-0.00850125	0.00142443	2.4e-09	2.92277e-05	35.6191
			EUR	LDL-C	rs13108218	4	3443931	G	A	1213113	0.385	0.0182714	0.00146485	1.05e-35	0.000128233	155.581
			EUR	LDL-C	rs4234798	4	7219933	G	T	1225532	0.39	-0.0110259	0.00141946	7.99e-15	4.92307e-05	60.3366
			EUR	LDL-C	rs2034796	4	15112878	G	A	1217982	0.437	0.00792348	0.00141491	2.14e-08	2.57467e-05	31.3598
			EUR	LDL-C	rs6448432	4	26098810	G	A	1229392	0.296	0.00874286	0.001515	7.89e-09	2.70882e-05	33.3028
			EUR	LDL-C	rs12504134	4	39485834	C	T	1230419	0.342	-0.00886162	0.00146791	1.57e-09	2.96184e-05	36.4441
			EUR	LDL-C	rs79623641	4	39999404	G	A	1201421	0.0677	-0.0179333	0.00282587	2.21e-10	3.35202e-05	40.2731
			EUR	LDL-C	rs112575086	4	54429890	C	T	1231259	0.12	-0.0139398	0.0021344	6.53e-11	3.46415e-05	42.6541
			EUR	LDL-C	rs146674238	4	69312382	A	T	1212968	0.0143	0.047162	0.00654042	5.56e-13	4.28652e-05	51.9963
			EUR	LDL-C	rs34707604	4	69491456	T	C	1129915	0.248	0.0317679	0.00186917	8.83e-65	0.000255578	288.854
			EUR	LDL-C	rs149314105	4	69519916	C	T	1198422	0.0275	-0.0338636	0.00500413	1.31e-11	3.82105e-05	45.794
			EUR	LDL-C	rs72663045	4	74177397	T	G	1231178	0.0196	0.0403007	0.00503784	1.25e-15	5.19748e-05	63.9935
			EUR	LDL-C	rs342467	4	88052219	C	T	1231199	0.399	-0.0101553	0.00141921	8.33e-13	4.15859e-05	51.2025
			EUR	LDL-C	rs11499828	4	100277558	T	C	1231258	0.108	0.0165038	0.0022549	2.5e-13	4.35056e-05	53.5689
			EUR	LDL-C	rs28497720	4	100487370	C	T	1231260	0.251	-0.0175436	0.00159642	4.3e-28	9.80733e-05	120.765
			EUR	LDL-C	rs17617028	4	106064683	G	A	1231250	0.217	0.0132543	0.00167534	2.54e-15	5.08323e-05	62.5903
			EUR	LDL-C	rs721412	4	110947478	A	G	1228581	0.31	-0.00925357	0.00151888	1.11e-09	3.02103e-05	37.1168
			EUR	LDL-C	rs138204164	4	120123417	C	G	1230447	0.132	-0.0145038	0.00206177	2e-12	4.02164e-05	49.486
			EUR	LDL-C	rs952225	4	151454015	T	C	1231254	0.354	-0.00840698	0.00145289	7.19e-09	2.71929e-05	33.4822
			EUR	LDL-C	rs41280463	4	154191226	G	A	1231254	0.167	-0.0152278	0.00185837	2.52e-16	5.45304e-05	67.1443
			EUR	LDL-C	rs116692022	4	155448758	A	G	1224200	0.013	0.0455428	0.0064595	1.78e-12	4.06043e-05	49.7097
			EUR	LDL-C	rs72701754	4	185251995	A	T	1201448	0.404	0.0091812	0.00143827	1.73e-10	3.39155e-05	40.749
			EUR	LDL-C	rs116734477	5	52095024	C	T	1231253	0.0377	-0.0511426	0.00366166	2.48e-44	0.000158414	195.078
			EUR	LDL-C	rs112838464	5	53308819	G	A	1231241	0.11	0.0135742	0.00221831	9.41e-10	3.04108e-05	37.4441
			EUR	LDL-C	rs2434583	5	57620041	A	C	1189693	0.469	0.0081978	0.00145351	1.7e-08	2.6737e-05	31.8096
			EUR	LDL-C	rs55869620	5	72381679	C	T	1199679	0.0515	-0.0256698	0.0033212	1.08e-14	4.9793e-05	59.7385
			EUR	LDL-C	rs72768309	5	74312482	G	C	1231149	0.0377	-0.0278833	0.0036492	2.16e-14	4.742e-05	58.3838
			EUR	LDL-C	rs7700965	5	74356857	T	C	1231115	0.353	0.0453918	0.00146732	1e-200	0.000776728	956.983
			EUR	LDL-C	rs74695562	5	74675951	T	G	1228685	0.0417	-0.0369214	0.00369832	1.8e-23	8.11095e-05	99.6659
			EUR	LDL-C	rs17649030	5	74984029	T	C	1231259	0.0714	0.0348889	0.00266187	3.01e-39	0.000139505	171.791
			EUR	LDL-C	rs62363367	5	75198461	A	C	1228418	0.0204	-0.0311531	0.00500228	4.73e-10	3.15723e-05	38.7852
			EUR	LDL-C	rs2617447	5	96267655	A	G	1228631	0.426	0.0084492	0.00140646	1.88e-09	2.93726e-05	36.0891
			EUR	LDL-C	rs6869845	5	122833703	T	C	1230360	0.451	-0.0167463	0.00139999	5.64e-33	0.00011628	143.083
			EUR	LDL-C	rs2706381	5	131810619	C	T	1227720	0.196	-0.0195199	0.00175196	7.86e-29	0.000101103	124.138
			EUR	LDL-C	rs13153174	5	139579421	C	G	1231148	0.214	-0.0107672	0.00168982	1.87e-10	3.29762e-05	40.5998
			EUR	LDL-C	rs11167778	5	141888881	C	T	1230451	0.107	0.0218031	0.00225008	3.33e-22	7.63033e-05	93.8944
			EUR	LDL-C	rs543486395	5	156375335	C	A	1063383	0.0233	-0.0488051	0.00600679	4.47e-16	6.20767e-05	66.0153
			EUR	LDL-C	rs12657266	5	156396003	T	C	1227808	0.365	-0.0353193	0.00143731	2.44e-133	0.000491563	603.841
			EUR	LDL-C	rs13360569	5	156422887	C	T	1220531	0.43	-0.00977922	0.00140806	3.78e-12	3.95185e-05	48.2353
			EUR	LDL-C	rs352942	5	176528386	G	A	1212243	0.252	-0.0104223	0.00163487	1.83e-10	3.3524e-05	40.6406
			EUR	LDL-C	rs272441	5	179301260	G	A	1211476	0.0899	0.0137103	0.00245056	2.21e-08	2.58367e-05	31.3013
			EUR	LDL-C	rs147539187	6	11839042	C	G	1230447	0.0685	-0.0230509	0.00276217	7.11e-17	5.65962e-05	69.6425
			EUR	LDL-C	rs2235215	6	16131156	T	C	1230411	0.321	-0.0318004	0.00148636	1.49e-101	0.000371882	457.737
			EUR	LDL-C	rs1418970	6	18773180	A	T	1089177	0.451	0.00906541	0.00151493	2.18e-09	3.28759e-05	35.8087
			EUR	LDL-C	rs1800562	6	26093141	G	A	1230196	0.0682	-0.0571711	0.00276108	3.05e-95	0.000348393	428.74
			EUR	LDL-C	rs78408557	6	27147693	C	T	1208498	0.0132	0.0401555	0.00671802	2.27e-09	2.9563e-05	35.7278
			EUR	LDL-C	rs1061537	6	29937795	G	A	993983	0.444	0.0135884	0.00159695	1.75e-17	7.28356e-05	72.4024
			EUR	LDL-C	rs28732146	6	31561353	T	A	1162197	0.196	0.0140004	0.00180155	7.77e-15	5.1962e-05	60.3931
			EUR	LDL-C	rs6689	6	32627700	A	G	1211341	0.203	0.0389564	0.0018946	6.03e-94	0.000348903	422.787
			EUR	LDL-C	rs114863007	6	34729158	G	A	1230379	0.0968	-0.0267129	0.00235203	6.82e-30	0.000104827	128.99
			EUR	LDL-C	rs62406547	6	37040428	A	C	1049765	0.496	-0.0127913	0.00155124	1.64e-16	6.47666e-05	67.994
			EUR	LDL-C	rs17665178	6	52435243	C	G	1216535	0.302	-0.0158917	0.00156116	2.45e-24	8.51695e-05	103.62
			EUR	LDL-C	rs12662589	6	53509035	G	C	1231247	0.259	0.015299	0.00158398	4.52e-22	7.57615e-05	93.288
			EUR	LDL-C	rs9496567	6	100602753	G	A	1231243	0.236	-0.0209744	0.00164372	2.73e-37	0.000132228	162.826
			EUR	LDL-C	rs62419249	6	101447338	G	A	1225747	0.478	0.0121051	0.00140411	6.63e-18	6.06328e-05	74.3248
			EUR	LDL-C	rs4946713	6	106374015	C	A	1228646	0.447	-0.0112055	0.00139973	1.19e-15	5.21584e-05	64.0875
			EUR	LDL-C	rs1556857	6	116325559	T	C	1231252	0.407	-0.0168848	0.00140839	4.07e-33	0.000116721	143.729
			EUR	LDL-C	rs72971192	6	127088318	T	C	1202168	0.235	-0.0118179	0.0016831	2.19e-12	4.10089e-05	49.3015
			EUR	LDL-C	rs141783576	6	127439897	G	C	1089171	0.069	0.0240255	0.0030723	5.28e-15	5.61432e-05	61.1529
			EUR	LDL-C	rs9399137	6	135419018	T	C	1230371	0.262	-0.0255597	0.00158355	1.32e-58	0.0002117	260.524
			EUR	LDL-C	rs76933614	6	139290015	T	C	1231192	0.0771	0.0231794	0.00267339	4.31e-18	6.10559e-05	75.176
			EUR	LDL-C	rs8191774	6	160461793	T	C	1227976	0.0164	-0.0340348	0.00551071	6.57e-10	3.10619e-05	38.1444
			EUR	LDL-C	rs112170089	6	160502019	G	A	1093937	0.0181	0.0521114	0.00593457	1.62e-18	7.04797e-05	77.1056
			EUR	LDL-C	rs12208357	6	160543148	C	T	1231254	0.0696	0.0644647	0.00269768	3.34e-126	0.000463569	571.035
			EUR	LDL-C	rs146534110	6	160578069	G	T	1229094	0.0115	0.0760646	0.00664093	2.25e-30	0.000106727	131.192
			EUR	LDL-C	rs139451770	6	160759810	A	C	1204365	0.00559	-0.054927	0.00977269	1.9e-08	2.62285e-05	31.5895
			EUR	LDL-C	rs144833821	6	160813782	T	C	1215692	0.00941	-0.0498411	0.00760725	5.69e-11	3.53086e-05	42.9259
			EUR	LDL-C	rs117733303	6	160922870	A	G	1230382	0.0176	0.145329	0.00530255	2.24e-165	0.000610141	751.163
			EUR	LDL-C	rs118039278	6	160985526	G	A	1228684	0.0691	0.113646	0.00277251	1e-200	0.00136562	1680.2
			EUR	LDL-C	rs12055389	6	161091952	C	T	1231114	0.0574	-0.0277593	0.003005	2.52e-20	6.93106e-05	85.335
			EUR	LDL-C	rs61730955	7	943868	G	A	1212928	0.0564	0.016898	0.00303299	2.53e-08	2.55907e-05	31.0404
			EUR	LDL-C	rs10272002	7	1047615	A	G	1224482	0.21	-0.0223057	0.00171399	1.02e-38	0.000138294	169.361
			EUR	LDL-C	rs34927723	7	21422925	C	T	1230441	0.157	-0.0133769	0.00193079	4.26e-12	3.90088e-05	47.9999
			EUR	LDL-C	rs55696093	7	21605973	A	G	1230421	0.211	0.0382032	0.0017054	3.82e-111	0.000407677	501.818
			EUR	LDL-C	rs896311	7	25934357	A	G	1220604	0.3	-0.0165774	0.00152682	1.84e-27	9.65696e-05	117.884
			EUR	LDL-C	rs56001710	7	25983400	T	A	965151	0.423	-0.0136714	0.00172087	1.95e-15	6.53892e-05	63.1145
			EUR	LDL-C	rs12533280	7	36171953	C	T	1230451	0.195	0.0180348	0.00175998	1.22e-24	8.53308e-05	105.004
			EUR	LDL-C	rs7808613	7	41746922	C	G	1224960	0.245	0.011275	0.00163494	5.34e-12	3.88231e-05	47.5586
			EUR	LDL-C	rs17725246	7	44581986	T	C	1199168	0.195	0.0427777	0.00178857	2.03e-126	0.0004768	572.035
			EUR	LDL-C	rs799157	7	73020301	C	T	1211433	0.0363	0.0317878	0.00387352	2.28e-16	5.55886e-05	67.3455
			EUR	LDL-C	rs1057868	7	75615006	C	T	1231038	0.288	0.0115162	0.00152729	4.69e-14	4.61832e-05	56.8558
			EUR	LDL-C	rs1014283	7	87076587	C	A	1231240	0.183	-0.0136301	0.00179818	3.46e-14	4.66626e-05	57.4554
			EUR	LDL-C	rs6967728	7	97915637	G	A	1218807	0.183	-0.0179411	0.00183651	1.53e-22	7.82965e-05	95.4357
			EUR	LDL-C	rs564449	7	100321138	G	T	1218830	0.115	0.0267236	0.00218062	1.58e-34	0.000123206	150.186
			EUR	LDL-C	rs1838931	7	130455588	C	T	1221309	0.312	0.0113437	0.00152716	1.1e-13	4.51747e-05	55.1747
			EUR	LDL-C	rs35106682	7	134383407	C	A	1231064	0.493	0.00782023	0.00139458	2.05e-08	2.55423e-05	31.445
			EUR	LDL-C	rs34372369	7	143092269	G	A	1231082	0.0508	0.0192832	0.00310689	5.41e-10	3.129e-05	38.5217
			EUR	LDL-C	rs4374942	7	155026807	T	C	1231236	0.0808	0.0199517	0.00255281	5.47e-15	4.96089e-05	61.0832
			EUR	LDL-C	rs11761517	7	158532706	C	T	1194294	0.461	-0.00818549	0.00143473	1.16e-08	2.72537e-05	32.5498
			EUR	LDL-C	rs2936512	8	6599005	C	T	1231262	0.326	-0.0119104	0.00148144	9e-16	5.24942e-05	64.6374
			EUR	LDL-C	rs49675	8	9151688	G	A	1231261	0.0912	0.0131875	0.00241881	4.98e-08	2.41413e-05	29.7249
			EUR	LDL-C	rs9987289	8	9183358	G	A	1231258	0.0918	-0.0598584	0.00239036	2.16e-138	0.000509042	627.08
			EUR	LDL-C	rs10108282	8	9720946	T	A	1231238	0.212	0.013887	0.0017083	4.32e-16	5.3669e-05	66.0827
			EUR	LDL-C	rs13255048	8	18276640	G	A	1231235	0.141	0.020952	0.00198805	5.71e-26	9.0202e-05	111.07
			EUR	LDL-C	rs151150389	8	28897171	T	C	1230449	0.0337	0.0297667	0.00382611	7.26e-15	4.91883e-05	60.5265
			EUR	LDL-C	rs117139027	8	29024943	G	A	1081192	0.0131	-0.0782787	0.00642262	3.6e-34	0.000137373	148.546
			EUR	LDL-C	rs34265667	8	41542093	G	A	1230452	0.0311	-0.0244429	0.00400661	1.06e-09	3.02464e-05	37.2178
			EUR	LDL-C	rs28615248	8	55451193	T	C	1230402	0.196	0.0244134	0.00175688	6.71e-44	0.000156912	193.095
			EUR	LDL-C	rs9297994	8	59392324	A	G	1230341	0.338	0.0355062	0.00146485	8.68e-130	0.000477298	587.518
			EUR	LDL-C	rs12114596	8	61518399	C	T	1059436	0.347	0.0117407	0.00161291	3.36e-13	5.00117e-05	52.9867
			EUR	LDL-C	rs62509311	8	74907295	A	T	1231219	0.279	-0.0152619	0.00156162	1.47e-22	7.75707e-05	95.5137
			EUR	LDL-C	rs2941465	8	76465909	C	T	1231262	0.437	-0.00842039	0.00139864	1.74e-09	2.94367e-05	36.2453
			EUR	LDL-C	rs2737245	8	116658583	G	T	1231202	0.277	-0.0253718	0.00155136	4.04e-60	0.000217197	267.471
			EUR	LDL-C	rs6999569	8	126475770	A	G	1215758	0.472	-0.0537463	0.00140371	1e-200	0.0012044	1466.03
			EUR	LDL-C	rs28894779	8	126536611	G	A	1230405	0.0345	-0.0236641	0.00383617	6.89e-10	3.09259e-05	38.0525
			EUR	LDL-C	rs45613837	8	141744917	G	A	1220596	0.451	-0.00793402	0.00142815	2.77e-08	2.52846e-05	30.863
			EUR	LDL-C	rs11787335	8	145044104	C	T	1221689	0.355	0.0231214	0.00146651	5.31e-56	0.000203427	248.575
			EUR	LDL-C	rs3780181	9	2640759	A	G	1231175	0.0696	-0.0358747	0.0027624	1.45e-38	0.00013697	168.656
			EUR	LDL-C	rs28498684	9	16900695	G	A	1218839	0.4	0.0131553	0.00141998	1.96e-20	7.04142e-05	85.8295
			EUR	LDL-C	rs12551960	9	19267440	C	T	1231241	0.0786	0.0349877	0.00264871	7.75e-40	0.000141696	174.486
			EUR	LDL-C	rs615552	9	22026077	T	C	1216589	0.439	0.00870666	0.00140987	6.6e-10	3.13464e-05	38.1368
			EUR	LDL-C	rs60988380	9	33117954	C	T	1230305	0.103	0.0130636	0.00230171	1.38e-08	2.61819e-05	32.2125
			EUR	LDL-C	rs7864568	9	78212428	G	A	1192893	0.316	-0.0155516	0.00155864	1.91e-23	8.34489e-05	99.5538
			EUR	LDL-C	rs1571791	9	78729213	C	T	1228648	0.38	0.0138569	0.00143531	4.71e-22	7.58543e-05	93.2052
			EUR	LDL-C	rs9410207	9	91404799	T	C	1226916	0.0656	-0.0200359	0.00282853	1.41e-12	4.08944e-05	50.1759
			EUR	LDL-C	rs2066714	9	107586753	T	C	1225087	0.124	0.0190072	0.00209648	1.23e-19	6.70902e-05	82.1967
			EUR	LDL-C	rs11789603	9	107647019	C	T	1230649	0.101	0.0235557	0.00232397	3.83e-24	8.34758e-05	102.738
			EUR	LDL-C	rs2740488	9	107661742	A	C	1230649	0.261	-0.0249217	0.00158221	6.74e-56	0.00020156	248.1
			EUR	LDL-C	rs56294298	9	117133524	G	A	1228531	0.0847	-0.0183291	0.00261275	2.3e-12	4.00574e-05	49.2137
			EUR	LDL-C	rs7025486	9	124422403	G	A	1230453	0.263	0.009415	0.00157012	2.02e-09	2.92211e-05	35.9562
			EUR	LDL-C	rs6478851	9	131561110	G	A	1227798	0.236	-0.0131604	0.00163805	9.42e-16	5.25695e-05	64.5481
			EUR	LDL-C	rs2519093	9	136141870	C	T	1230436	0.188	0.0724494	0.00175473	1e-200	0.00138353	1704.7
			EUR	LDL-C	rs76643124	9	136356448	G	A	1223587	0.0243	-0.0289355	0.00450465	1.33e-10	3.37202e-05	41.2609
			EUR	LDL-C	rs13301660	9	139340802	C	T	1215727	0.27	-0.0156411	0.00156988	2.21e-23	8.16451e-05	99.2661
			EUR	LDL-C	rs263423	10	8089033	G	A	1211478	0.201	-0.0106027	0.00175555	1.55e-09	3.01077e-05	36.4759
			EUR	LDL-C	rs7903259	10	17259642	C	G	1201162	0.416	0.0163158	0.00142246	1.86e-30	0.000109518	131.564
			EUR	LDL-C	rs12354765	10	43918823	T	A	1062685	0.248	-0.0106306	0.00175342	1.34e-09	3.45879e-05	36.7572
			EUR	LDL-C	rs1031101	10	54533360	A	G	1231262	0.142	0.0120767	0.00197776	1.02e-09	3.02821e-05	37.2862
			EUR	LDL-C	rs1896995	10	65365385	T	C	1218730	0.498	-0.0121975	0.00141088	5.37e-18	6.13236e-05	74.7413
			EUR	LDL-C	rs17476364	10	71094504	T	C	1231133	0.0989	-0.0268457	0.00233191	1.14e-30	0.00010764	132.533
			EUR	LDL-C	rs1870140	10	82246749	G	A	1225967	0.157	-0.0124748	0.00192407	8.96e-11	3.42872e-05	42.0363
			EUR	LDL-C	rs2068888	10	94839642	G	A	1220196	0.451	-0.0180327	0.00139568	3.45e-38	0.000136792	166.936
			EUR	LDL-C	rs61886346	10	96101364	C	T	1230415	0.0612	-0.0192465	0.00291427	4e-11	3.54468e-05	43.6157
			EUR	LDL-C	rs603424	10	102075479	G	A	1222742	0.169	0.0158621	0.0018835	3.71e-17	5.80003e-05	70.9234
			EUR	LDL-C	rs78531123	10	104082953	G	A	1201449	0.0611	0.0182966	0.00291554	3.48e-10	3.27781e-05	39.3824
			EUR	LDL-C	rs2792751	10	113940329	C	T	1230453	0.281	0.023866	0.00153005	7.49e-55	0.000197696	243.303
			EUR	LDL-C	rs60847460	10	113983758	C	T	1230320	0.14	-0.0181506	0.00198944	7.28e-20	6.76508e-05	83.2376
			EUR	LDL-C	rs2301179	10	118404620	G	A	1227839	0.492	-0.0158997	0.00139539	4.46e-30	0.00010573	129.833
			EUR	LDL-C	rs7904973	10	124693587	T	G	1223462	0.424	-0.0209679	0.00140615	2.77e-50	0.000181709	222.354
			EUR	LDL-C	rs11246280	11	707424	T	C	1213269	0.478	0.00823274	0.00142469	7.53e-09	2.75219e-05	33.3924
			EUR	LDL-C	rs7124487	11	2988323	C	T	1230443	0.186	-0.011576	0.00182058	2.04e-10	3.28565e-05	40.4294
			EUR	LDL-C	rs7108486	11	5677158	T	C	1230091	0.0244	-0.0322033	0.00457976	2.04e-12	4.01939e-05	49.4441
			EUR	LDL-C	rs12271333	11	5690691	A	C	1230452	0.134	0.0164797	0.00203348	5.31e-16	5.33741e-05	65.6777
			EUR	LDL-C	rs11601507	11	5701074	C	A	841664	0.07	0.0404129	0.00317615	4.36e-37	0.000192316	161.896
			EUR	LDL-C	rs214080	11	17299762	G	A	1196938	0.414	-0.00804652	0.00143211	1.92e-08	2.63743e-05	31.5691
			EUR	LDL-C	rs10832956	11	18645668	C	T	1227839	0.272	-0.0208132	0.00155842	1.1e-40	0.000145246	178.364
			EUR	LDL-C	rs223042	11	32113944	G	C	1231184	0.136	0.0116984	0.00201287	6.18e-09	2.74338e-05	33.777
			EUR	LDL-C	rs61882680	11	46370636	C	T	1231245	0.0304	-0.0279637	0.00410924	1.01e-11	3.76102e-05	46.309
			EUR	LDL-C	rs174547	11	61570783	T	C	1230440	0.346	-0.0429432	0.00145569	2.86e-191	0.000706779	870.263
			EUR	LDL-C	rs77631946	11	63688374	C	A	1219759	0.0931	-0.0187374	0.00246206	2.73e-14	4.74818e-05	57.9189
			EUR	LDL-C	rs56223081	11	65961498	G	T	1230427	0.0492	0.0187347	0.00330254	1.4e-08	2.61535e-05	32.1808
			EUR	LDL-C	rs1638586	11	67174597	G	A	1230291	0.0796	-0.0195809	0.00257382	2.79e-14	4.70414e-05	57.8773
			EUR	LDL-C	rs78643851	11	69706362	G	T	1206954	0.0213	0.0348153	0.00538983	1.05e-10	3.45688e-05	41.7243
			EUR	LDL-C	rs10899485	11	78072383	T	C	1226138	0.163	-0.0117891	0.00188189	3.74e-10	3.20051e-05	39.2439
			EUR	LDL-C	rs11226108	11	103870755	G	C	1230403	0.191	-0.0142732	0.00180053	2.24e-15	5.10708e-05	62.8407
			EUR	LDL-C	rs964184	11	116648917	C	G	1227839	0.135	0.0552411	0.00201933	9.12e-165	0.000609122	748.358
			EUR	LDL-C	rs141469619	11	116714293	A	G	1221185	0.0092	0.0725318	0.00796181	8.24e-20	6.79551e-05	82.9913
			EUR	LDL-C	rs12970	11	117074109	G	A	1230419	0.0614	-0.0267765	0.00289824	2.49e-20	6.93675e-05	85.3568
			EUR	LDL-C	rs11218753	11	122553836	A	T	1226078	0.256	0.0091906	0.00159437	8.19e-09	2.71006e-05	33.2284
			EUR	LDL-C	rs4307732	11	126244955	G	A	1230366	0.108	0.047985	0.00221699	6.89e-104	0.000380613	468.471
			EUR	LDL-C	rs55943924	11	134294813	G	A	1230232	0.119	-0.0119692	0.00214672	2.47e-08	2.52686e-05	31.087
			EUR	LDL-C	rs35882350	12	623129	A	G	1213975	0.256	0.0181651	0.00162585	5.55e-29	0.000102816	124.829
			EUR	LDL-C	rs117233107	12	4328521	G	A	1224100	0.0148	-0.0459407	0.00599266	1.77e-14	4.80085e-05	58.7699
			EUR	LDL-C	rs75667995	12	25409070	T	C	1231245	0.0682	-0.0291431	0.00273128	1.4e-26	9.24601e-05	113.851
			EUR	LDL-C	rs11048637	12	26825183	G	T	1055486	0.488	-0.00875979	0.00155	1.59e-08	3.02593e-05	31.9391
			EUR	LDL-C	rs10843390	12	29496991	C	T	1226943	0.28	-0.0097591	0.00154733	2.84e-10	3.24202e-05	39.7789
			EUR	LDL-C	rs11175540	12	40586295	T	A	1201269	0.0661	0.0260974	0.00284853	5.11e-20	6.98686e-05	83.9368
			EUR	LDL-C	rs2250751	12	51106178	G	A	1223154	0.341	-0.0165291	0.00147712	4.56e-29	0.000102363	125.218
			EUR	LDL-C	rs7300192	12	51794043	G	A	1205486	0.365	0.0134682	0.00146867	4.72e-20	6.97555e-05	84.095
			EUR	LDL-C	rs74090765	12	53792914	T	G	1226945	0.173	0.0144654	0.00183467	3.16e-15	5.06638e-05	62.1648
			EUR	LDL-C	rs61754230	12	72179446	C	T	1100434	0.0158	0.0491427	0.00574339	1.16e-17	6.65256e-05	73.2117
			EUR	LDL-C	rs12306780	12	89921860	A	T	1218828	0.342	0.0115655	0.00146541	2.97e-15	5.11029e-05	62.2888
			EUR	LDL-C	rs1515565	12	92818786	G	A	1220314	0.482	-0.00927654	0.00139218	2.68e-11	3.63826e-05	44.3998
			EUR	LDL-C	rs11837065	12	100859983	C	T	1217814	0.366	-0.0111241	0.00147305	4.29e-14	4.68267e-05	57.0288
			EUR	LDL-C	rs1850956	12	103453387	C	T	1218011	0.494	-0.00823251	0.00141002	5.26e-09	2.79866e-05	34.0889
			EUR	LDL-C	rs3184504	12	111884608	C	T	1230454	0.473	-0.0234144	0.00139369	2.43e-63	0.000229334	282.249
			EUR	LDL-C	rs1169288	12	121416650	A	C	1230241	0.322	0.0358725	0.0014912	7.2e-128	0.000470172	578.696
			EUR	LDL-C	rs2247139	12	122380274	G	A	1230444	0.132	0.0132285	0.00204579	1e-10	3.39799e-05	41.8118
			EUR	LDL-C	rs2451322	12	124545515	A	G	1220630	0.405	-0.0106423	0.00142294	7.48e-14	4.58241e-05	55.9367
			EUR	LDL-C	rs11057841	12	125316743	C	T	1223721	0.141	0.0218674	0.0020187	2.42e-27	9.58797e-05	117.341
			EUR	LDL-C	rs75588192	12	133048600	G	A	1097902	0.14	0.0164726	0.0021227	8.48e-15	5.48479e-05	60.2208
			EUR	LDL-C	rs5026917	13	31010795	A	C	1188237	0.386	-0.00885758	0.00146939	1.66e-09	3.05802e-05	36.3375
			EUR	LDL-C	rs7997102	13	32445660	T	C	1226936	0.318	-0.00840639	0.00148711	1.58e-08	2.60435e-05	31.9545
			EUR	LDL-C	rs7327867	13	32968591	A	G	1224331	0.474	0.0198561	0.00139678	7.33e-46	0.000165029	202.084
			EUR	LDL-C	rs208432	13	33122007	T	C	1226912	0.386	0.0106618	0.00143212	9.71e-14	4.5172e-05	55.4245
			EUR	LDL-C	rs17532371	13	41635301	C	G	1231232	0.0706	-0.0193589	0.00271228	9.5e-13	4.13747e-05	50.9438
			EUR	LDL-C	rs4942833	13	50081358	T	C	1224280	0.475	0.0082772	0.00139348	2.85e-09	2.88186e-05	35.2829
			EUR	LDL-C	rs9535755	13	52339143	C	G	1231233	0.172	0.0114717	0.00183435	4.01e-10	3.17641e-05	39.1102
			EUR	LDL-C	rs9592980	13	74855425	A	G	1218812	0.415	-0.0095033	0.00142143	2.3e-11	3.66729e-05	44.6989
			EUR	LDL-C	rs9543956	13	76098660	G	T	1199612	0.272	-0.00888884	0.00159449	2.48e-08	2.59057e-05	31.0775
			EUR	LDL-C	rs7330899	13	95223400	G	A	1231229	0.244	0.0143148	0.00161093	6.33e-19	6.41284e-05	78.9617
			EUR	LDL-C	rs551473284	13	111038325	C	T	932168	0.366	-0.0152014	0.0016659	7.17e-20	8.93175e-05	83.2661
			EUR	LDL-C	rs6602909	13	114551993	T	C	1193828	0.33	0.0211903	0.00151305	1.45e-44	0.000164269	196.14
			EUR	LDL-C	rs12016920	13	114639025	T	C	1218065	0.193	-0.0171653	0.00180179	1.62e-21	7.45061e-05	90.7598
			EUR	LDL-C	rs11621792	14	24871926	C	T	1215093	0.449	0.0219774	0.00142294	8.14e-54	0.000196284	238.55
			EUR	LDL-C	rs11846704	14	35186694	C	T	1231179	0.267	-0.0137613	0.00156628	1.55e-18	6.26948e-05	77.1933
			EUR	LDL-C	rs114491880	14	51373247	A	T	1227530	0.0178	0.0334713	0.00533103	3.42e-10	3.21127e-05	39.4205
			EUR	LDL-C	rs17101394	14	64232386	G	A	1225533	0.16	0.0153532	0.00190294	7.14e-16	5.31128e-05	65.0949
			EUR	LDL-C	rs7157399	14	70846954	C	T	1220634	0.14	-0.0253853	0.00200506	9.77e-37	0.000131301	160.291
			EUR	LDL-C	rs13379043	14	74250126	T	C	1222723	0.271	-0.0165377	0.00156818	5.31e-26	9.09475e-05	111.214
			EUR	LDL-C	rs34752362	14	75232306	G	A	1223509	0.443	-0.00964234	0.00141299	8.85e-12	3.80595e-05	46.5678
			EUR	LDL-C	rs17776811	14	90066451	C	A	1225534	0.397	0.00937185	0.00141889	3.97e-11	3.55969e-05	43.6267
			EUR	LDL-C	rs28929474	14	94844947	C	T	1229467	0.018	0.0527623	0.00518309	2.44e-24	8.42784e-05	103.626
			EUR	LDL-C	rs17580	14	94847262	T	A	1222974	0.0387	0.0498131	0.00361468	3.33e-43	0.000155261	189.91
			EUR	LDL-C	rs28375625	15	49742494	C	A	1218841	0.461	-0.00909575	0.00140542	9.68e-11	3.43639e-05	41.8855
			EUR	LDL-C	rs79391862	15	53739426	A	C	1222627	0.0202	-0.0639367	0.00532487	3.26e-33	0.000117906	144.172
			EUR	LDL-C	rs148086620	15	57415927	A	G	1231188	0.0422	0.0297385	0.00354558	4.97e-17	5.71366e-05	70.3498
			EUR	LDL-C	rs686958	15	58741884	A	T	1218743	0.181	0.0115423	0.00181318	1.94e-10	3.32488e-05	40.5231
			EUR	LDL-C	rs11636087	15	63788267	T	C	1218840	0.298	0.0144221	0.00154909	1.28e-20	7.11093e-05	86.6768
			EUR	LDL-C	rs12917376	15	75116167	T	C	1213921	0.423	-0.0125937	0.00142309	8.79e-19	6.45095e-05	78.3143
			EUR	LDL-C	rs1567670	15	77275072	G	A	1226923	0.183	-0.00989616	0.00181285	4.79e-08	2.42874e-05	29.7995
			EUR	LDL-C	rs8038512	15	89106233	G	T	1216216	0.356	-0.00924136	0.00148063	4.33e-10	3.20298e-05	38.9563
			EUR	LDL-C	rs8029797	15	101906159	T	A	1224331	0.313	-0.00949676	0.00149208	1.96e-10	3.30867e-05	40.5104
			EUR	LDL-C	rs17703146	16	4860105	T	C	1230393	0.162	0.0112556	0.00195693	8.84e-09	2.68863e-05	33.0816
			EUR	LDL-C	rs12445804	16	11706100	G	A	1222975	0.0763	0.0325513	0.00267884	5.65e-34	0.000120718	147.653
			EUR	LDL-C	rs72772042	16	15863759	C	A	1230431	0.146	-0.0123084	0.00195634	3.14e-10	3.21694e-05	39.5835
			EUR	LDL-C	rs35468353	16	31056433	A	G	1227839	0.377	0.0118798	0.00143087	1.02e-16	5.61374e-05	68.9314
			EUR	LDL-C	rs74019283	16	55870239	G	T	1227123	0.0385	-0.0208027	0.00375364	2.99e-08	2.50285e-05	30.7138
			EUR	LDL-C	rs247617	16	56990716	C	A	1230433	0.321	-0.0366691	0.00148161	3.14e-135	0.000497575	612.537
			EUR	LDL-C	rs117753658	16	71571282	A	G	1219337	0.0186	-0.0572019	0.00550396	2.67e-25	8.85744e-05	108.011
			EUR	LDL-C	rs11648003	16	72052348	A	G	1226846	0.225	0.0515795	0.00166854	1e-200	0.00077831	955.609
			EUR	LDL-C	rs7191623	16	72212044	G	A	1231261	0.208	-0.0147557	0.00171914	9.23e-18	5.98303e-05	73.671
			EUR	LDL-C	rs9938506	16	72252752	A	G	1224330	0.327	0.0205816	0.00151373	4.19e-42	0.000150972	184.868
			EUR	LDL-C	rs67890964	16	83979317	T	C	1201951	0.381	-0.0182605	0.0014752	3.42e-35	0.000127462	153.223
			EUR	LDL-C	rs576285576	16	88527501	A	G	858775	0.0778	-0.0221474	0.00366466	1.51e-09	4.25285e-05	36.5239
			EUR	LDL-C	rs539705186	16	88572668	T	G	899833	0.0833	0.0209128	0.00304182	6.19e-12	5.25258e-05	47.2668
			EUR	LDL-C	rs7213347	17	2153257	C	G	1220624	0.301	0.00853247	0.001524	2.16e-08	2.56795e-05	31.3458
			EUR	LDL-C	rs55714927	17	7080316	C	T	1188821	0.189	-0.0349154	0.00183132	4.87e-81	0.000305672	363.5
			EUR	LDL-C	rs150688657	17	7505801	G	A	1230359	0.103	0.0215663	0.00231561	1.24e-20	7.04949e-05	86.7401
			EUR	LDL-C	rs10462024	17	8051639	A	G	1213113	0.422	0.0090282	0.00145453	5.4e-10	3.17572e-05	38.5262
			EUR	LDL-C	rs28811342	17	18125845	T	C	1230439	0.197	0.0125833	0.0017499	6.44e-13	4.20227e-05	51.7085
			EUR	LDL-C	rs9909417	17	18679442	G	A	1227157	0.284	0.00930066	0.00155538	2.24e-09	2.91368e-05	35.7564
			EUR	LDL-C	rs704	17	26694861	G	A	1225534	0.477	0.018865	0.00138898	5.13e-42	0.000150498	184.468
			EUR	LDL-C	rs117765227	17	26853356	C	T	1230317	0.0294	-0.031086	0.00415197	7.04e-14	4.55601e-05	56.0558
			EUR	LDL-C	rs62070652	17	29221277	C	T	1227832	0.266	0.0134136	0.00157535	1.67e-17	5.90435e-05	72.4996
			EUR	LDL-C	rs525767	17	37070737	G	A	1222417	0.346	0.00982307	0.00146487	2e-11	3.67842e-05	44.9672
			EUR	LDL-C	rs12943633	17	37970365	C	T	1230453	0.0812	-0.0177676	0.00255433	3.5e-12	3.93207e-05	48.3841
			EUR	LDL-C	rs12949918	17	40526273	T	C	1226947	0.427	0.00892227	0.00140368	2.07e-10	3.29287e-05	40.403
			EUR	LDL-C	rs72836561	17	41926126	C	T	1225370	0.0304	-0.0297626	0.0040428	1.81e-13	4.42273e-05	54.1972
			EUR	LDL-C	rs12603290	17	45650196	C	T	1215620	0.495	0.0267572	0.00143656	1.98e-77	0.000285307	346.923
			EUR	LDL-C	rs1292069	17	57928290	T	C	1224250	0.454	-0.00983617	0.00140296	2.37e-12	4.01489e-05	49.1542
			EUR	LDL-C	rs1801689	17	64210580	A	C	1224680	0.0261	0.0908315	0.00428983	1.67e-99	0.000365941	448.324
			EUR	LDL-C	rs78186330	17	66004715	G	A	1195580	0.208	0.0163391	0.00176585	2.19e-20	7.16043e-05	85.6146
			EUR	LDL-C	rs77542162	17	67081278	A	G	1226076	0.0196	0.18313	0.00508432	1e-200	0.001057	1297.34
			EUR	LDL-C	rs72631343	17	67191270	C	G	1230361	0.13	-0.0438838	0.00206407	2.62e-100	0.000367255	452.021
			EUR	LDL-C	rs2125345	17	73782191	T	C	1230391	0.292	-0.0166904	0.00152666	8.05e-28	9.71323e-05	119.522
			EUR	LDL-C	rs12451056	17	76396188	C	T	1230448	0.144	-0.018873	0.0019604	6.14e-22	7.53176e-05	92.6812
			EUR	LDL-C	rs62076528	17	78330756	A	G	1217893	0.403	0.00798748	0.00142685	2.17e-08	2.57302e-05	31.3373
			EUR	LDL-C	rs2840354	18	9545961	C	T	1230421	0.191	0.011566	0.00177873	7.91e-11	3.43619e-05	42.281
			EUR	LDL-C	rs1010810	18	19677934	G	A	1230433	0.116	-0.0131259	0.00217345	1.55e-09	2.96407e-05	36.4719
			EUR	LDL-C	rs77960347	18	47109955	A	G	1228446	0.0125	0.0699399	0.00619973	1.63e-29	0.000103587	127.263
			EUR	LDL-C	rs10438978	18	47158186	C	T	1230455	0.18	-0.0177685	0.0018146	1.22e-22	7.79184e-05	95.8824
			EUR	LDL-C	rs12968116	18	55322502	C	T	1230451	0.126	0.0142034	0.00209432	1.19e-11	3.73782e-05	45.9936
			EUR	LDL-C	rs8096658	18	77156537	C	G	1193647	0.489	-0.00831808	0.00146692	1.42e-08	2.69368e-05	32.1538
			EUR	LDL-C	rs12454507	18	77825981	A	G	1106291	0.284	0.00992896	0.00159069	4.32e-10	3.5217e-05	38.9615
			EUR	LDL-C	rs123698	19	807442	C	G	1114256	0.384	-0.00888028	0.00161818	4.07e-08	2.70273e-05	30.1161
			EUR	LDL-C	rs2238614	19	2755339	G	A	1226342	0.208	0.0138969	0.00172061	6.65e-16	5.31908e-05	65.2334
			EUR	LDL-C	rs45518133	19	10670351	C	T	1223606	0.0135	-0.112477	0.00598604	9.14e-79	0.000288457	353.059
			EUR	LDL-C	rs183312616	19	10682640	C	A	1055844	0.0431	0.0391155	0.00425123	3.55e-20	8.01741e-05	84.6579
			EUR	LDL-C	rs8110479	19	10734951	C	T	1218686	0.0424	-0.124497	0.00363328	1e-200	0.000962521	1174.14
			EUR	LDL-C	rs147622113	19	10771941	C	T	1225982	0.0271	0.0327371	0.00433129	4.08e-14	4.65952e-05	57.1275
			EUR	LDL-C	rs73007510	19	10806699	C	T	1222307	0.0171	-0.0491233	0.00579456	2.3e-17	5.87934e-05	71.8676
			EUR	LDL-C	rs141015559	19	10817126	G	A	1200674	0.0135	0.0481103	0.00653878	1.87e-13	4.50856e-05	54.1355
			EUR	LDL-C	rs34795914	19	10936814	G	T	1184709	0.0278	0.0614984	0.00462547	2.45e-40	0.00014919	176.773
			EUR	LDL-C	rs73013176	19	11147526	T	C	1223843	0.0118	-0.214147	0.00676303	1e-200	0.000818578	1002.63
			EUR	LDL-C	rs112159161	19	11192603	C	T	1225003	0.0146	-0.200048	0.00590967	1e-200	0.000934542	1145.89
			EUR	LDL-C	rs147540853	19	11248104	G	A	1231152	0.0262	-0.0911257	0.00429151	4.64e-100	0.000366092	450.88
			EUR	LDL-C	rs143811369	19	18683340	A	G	1221441	0.0252	-0.0294073	0.00471178	4.34e-10	3.189e-05	38.9529
			EUR	LDL-C	rs187429064	19	19380513	A	G	1193423	0.0117	-0.160458	0.00693095	1.42e-118	0.000448898	535.965
			EUR	LDL-C	rs10401969	19	19407718	T	C	1231172	0.0765	-0.106102	0.0026007	1e-200	0.00135009	1664.43
			EUR	LDL-C	rs147791730	19	33864260	G	A	1230422	0.028	-0.0290811	0.00417575	3.3e-12	3.94168e-05	48.5011
			EUR	LDL-C	rs576100986	19	41389045	C	T	1064305	0.017	-0.0358627	0.00625925	1.01e-08	3.08434e-05	32.8277
			EUR	LDL-C	rs74747585	19	45039971	T	C	1225049	0.0202	-0.109328	0.00507731	7.7e-103	0.000378336	463.655
			EUR	LDL-C	rs62119261	19	45122043	A	C	1228633	0.0414	-0.112605	0.00353352	1e-200	0.000825884	1015.55
			EUR	LDL-C	rs73048351	19	45160086	C	A	1223912	0.00968	-0.254968	0.00740551	1e-200	0.000967589	1185.39
			EUR	LDL-C	rs4803748	19	45247048	C	T	1213922	0.384	-0.0749909	0.00147706	1e-200	0.00211889	2577.63
			EUR	LDL-C	rs147711004	19	45337918	G	A	1227349	0.0374	0.150569	0.00389062	1e-200	0.00121881	1497.73
			EUR	LDL-C	rs141739979	19	45374983	G	T	1221970	0.01	-0.0541638	0.00751643	5.76e-13	4.24929e-05	51.9271
			EUR	LDL-C	rs113139066	19	45512415	T	G	1211047	0.00902	0.0949671	0.00829662	2.45e-30	0.000108177	131.022
			EUR	LDL-C	rs8108762	19	45653227	G	A	1216534	0.319	-0.0292256	0.0015278	1.44e-81	0.000300704	365.926
			EUR	LDL-C	rs117252809	19	45957953	A	T	1036303	0.00396	0.0851819	0.0124248	7.09e-12	4.53534e-05	47.0019
			EUR	LDL-C	rs35978917	19	46383885	T	C	1223782	0.0646	-0.0434724	0.00297811	2.92e-48	0.000174087	213.081
			EUR	LDL-C	rs12979383	19	57079997	A	G	1224323	0.282	-0.0089928	0.00154744	6.2e-09	2.75838e-05	33.7724
			EUR	LDL-C	rs145467679	19	58308789	T	C	1216624	0.00843	0.0608044	0.00783228	8.27e-15	4.95354e-05	60.2688
			EUR	LDL-C	rs35081008	19	58662235	C	T	1231233	0.155	-0.0308607	0.0019307	1.65e-57	0.000207468	255.494
			EUR	LDL-C	rs56225452	19	59024646	C	T	1226343	0.18	0.0171791	0.00180594	1.86e-21	7.3782e-05	90.4885
			EUR	LDL-C	rs62204032	20	5549506	A	T	1220569	0.0478	-0.0213519	0.0035406	1.63e-09	2.9795e-05	36.3679
			EUR	LDL-C	rs73075609	20	5580789	C	T	1228539	0.0239	0.0479201	0.00475232	6.53e-24	8.27559e-05	101.677
			EUR	LDL-C	rs969075	20	17792323	C	T	1218838	0.335	-0.0147326	0.00149902	8.52e-23	7.92435e-05	96.5925
			EUR	LDL-C	rs2618566	20	17844684	T	G	1178991	0.339	0.040212	0.00151102	4.87e-156	0.000600343	708.223
			EUR	LDL-C	rs3746337	20	25208272	C	T	1221219	0.492	0.0102564	0.00141461	4.16e-13	4.30432e-05	52.5673
			EUR	LDL-C	rs6060491	20	34175100	C	T	1230434	0.124	-0.0301101	0.00210738	2.6e-46	0.000165885	204.145
			EUR	LDL-C	rs2207132	20	39142516	G	A	1223623	0.0329	0.124182	0.00410721	1e-200	0.000746537	914.161
			EUR	LDL-C	rs1997833	20	39690342	T	C	1220646	0.285	0.025319	0.00155813	2.25e-59	0.000216273	264.049
			EUR	LDL-C	rs389877	20	44532484	C	G	1188841	0.191	-0.0122054	0.00182561	2.3e-11	3.75965e-05	44.6979
			EUR	LDL-C	rs1569750	20	47603241	A	G	1230428	0.306	0.0112846	0.00153404	1.89e-13	4.39768e-05	54.1126
			EUR	LDL-C	rs6022851	20	52536425	C	T	1193508	0.446	0.0115658	0.0014229	4.35e-16	5.53545e-05	66.0696
			EUR	LDL-C	rs117590445	20	61321110	C	T	1209485	0.0161	-0.037904	0.00587766	1.13e-10	3.43832e-05	41.5873
			EUR	LDL-C	rs2257885	20	62334220	G	A	1224017	0.247	0.0123305	0.00162928	3.79e-14	4.6791e-05	57.2755
			EUR	LDL-C	rs6090040	20	62692060	C	A	1073397	0.483	0.0143197	0.00147233	2.34e-22	8.81168e-05	94.5925
			EUR	LDL-C	rs73147887	20	62890294	C	G	1108562	0.212	0.0158654	0.00178832	7.21e-19	7.09939e-05	78.7065
			EUR	LDL-C	rs12106385	21	16586682	T	A	1231164	0.0185	-0.0364153	0.00551245	3.95e-11	3.54444e-05	43.6393
			EUR	LDL-C	rs112244600	21	33086058	C	T	1072430	0.0511	0.0301192	0.00356446	2.92e-17	6.65735e-05	71.4001
			EUR	LDL-C	rs1963676	21	40709960	T	C	1220535	0.424	-0.0143783	0.00143027	8.92e-24	8.27928e-05	101.06
			EUR	LDL-C	rs5746498	22	18435794	T	C	1212286	0.238	0.0133001	0.00169736	4.66e-15	5.06448e-05	61.399
			EUR	LDL-C	rs8139142	22	21910280	T	C	1157656	0.2	-0.0135048	0.00201931	2.27e-11	3.86344e-05	44.727
			EUR	LDL-C	rs5752963	22	30203833	G	A	1230389	0.0365	0.0267521	0.00365516	2.5e-13	4.35353e-05	53.5676
			EUR	LDL-C	rs5755688	22	35685048	G	A	1218023	0.359	0.0136768	0.00145715	6.23e-21	7.23225e-05	88.0967
			EUR	LDL-C	rs138352	22	41268925	G	T	1227831	0.346	0.0137988	0.00147717	9.51e-21	7.10644e-05	87.2612
			EUR	LDL-C	rs9615108	22	45723854	G	C	1191635	0.387	-0.00978761	0.00144914	1.44e-11	3.82801e-05	45.6175
			EUR	LDL-C	rs13268	22	45996298	A	G	1224394	0.0242	-0.0379802	0.00452552	4.76e-17	5.75217e-05	70.4331
			EUR	LDL-C	rs41329344	22	46636930	C	T	1230372	0.107	0.0137729	0.00223775	7.52e-10	3.07877e-05	37.8815
			HIS	LDL-C	rs11591147	1	55505647	G	T	44345	0.00829	-0.485403	0.0369179	1.74e-39	0.00388326	172.867
			HIS	LDL-C	rs11804420	1	55520445	A	G	46039	0.0578	-0.109074	0.0145983	7.92e-14	0.00121112	55.8238
			HIS	LDL-C	rs10889335	1	62960101	A	G	46038	0.36	-0.0452991	0.00724284	3.99e-10	0.000848938	39.1149
			HIS	LDL-C	rs660240	1	109817838	C	T	46040	0.213	-0.180406	0.00812404	2.98e-109	0.0105973	493.105
			HIS	LDL-C	rs934197	2	21267461	G	A	46039	0.274	0.107754	0.00749806	7.88e-47	0.0044658	206.514
			HIS	LDL-C	rs563222733	2	21268824	T	A	44735	0.00845	-0.221004	0.0382961	7.88e-09	0.00074391	33.3021
			HIS	LDL-C	rs1260326	2	27730940	C	T	46039	0.339	0.038983	0.0071149	4.28e-08	0.000651634	30.0188
			HIS	LDL-C	rs4245791	2	44074431	T	C	46038	0.199	0.0814842	0.00840447	3.16e-22	0.00203762	93.9955
			HIS	LDL-C	rs12916	5	74656539	T	C	46038	0.387	0.0743469	0.00687365	2.88e-27	0.00253473	116.985
			HIS	LDL-C	rs113198605	6	32640020	G	T	41134	0.12	0.0782652	0.0130802	2.18e-09	0.000869621	35.8004
			HIS	LDL-C	rs3798169	6	160556197	T	G	33989	0.192	-0.0709036	0.00991893	8.79e-13	0.00150112	51.0953
			HIS	LDL-C	rs7012814	8	9173358	G	A	46037	0.492	0.0400191	0.00698423	1e-08	0.000712658	32.8306
			HIS	LDL-C	rs6982502	8	126479362	T	C	46038	0.495	0.0647801	0.00678212	1.28e-21	0.00197777	91.2291
			HIS	LDL-C	rs635634	9	136155000	C	T	46039	0.143	0.102583	0.00956584	7.86e-27	0.0024917	114.997
			HIS	LDL-C	rs4055121	11	126232337	C	T	46039	0.143	0.056118	0.00958936	4.85e-09	0.000743321	34.2457
			HIS	LDL-C	rs217181	16	72114002	C	T	33989	0.332	-0.0499465	0.0085893	6.06e-09	0.000993858	33.8119
			HIS	LDL-C	rs138294113	19	11191729	C	T	33989	0.0867	-0.19329	0.0137682	9.01e-45	0.00576521	197.078
			HIS	LDL-C	rs74180176	19	11413356	C	T	33989	0.303	-0.0486252	0.00887159	4.23e-08	0.000883075	30.0396
			HIS	LDL-C	rs58542926	19	19379549	C	T	33989	0.0461	-0.18526	0.01819	2.32e-24	0.00304254	103.722
			HIS	LDL-C	rs115205560	19	19749896	A	T	33989	0.0712	-0.104731	0.0154583	1.24e-11	0.00134866	45.8988
			HIS	LDL-C	rs7412	19	45412079	C	T	33989	0.0345	-0.434251	0.0209968	5.06e-95	0.0124281	427.71
			HIS	LDL-C	rs12721051	19	45422160	C	G	33989	0.085	0.113691	0.0138679	2.44e-16	0.00197349	67.2056
			SAS	LDL-C	rs693668	1	55521109	A	G	37482	0.386	-0.0512641	0.00809211	2.37e-10	0.00106959	40.131
			SAS	LDL-C	rs660240	1	109817838	C	T	40472	0.252	-0.169145	0.00809527	6.03e-97	0.0106719	436.55
			SAS	LDL-C	rs1800481	2	21267210	G	A	40472	0.133	-0.0939524	0.0104663	2.79e-19	0.00198706	80.5764
			SAS	LDL-C	rs3846663	5	74655726	T	C	40471	0.456	-0.0600591	0.00706668	1.91e-17	0.00178159	72.228
			SAS	LDL-C	rs7004769	8	9187595	G	A	40472	0.198	-0.0530572	0.00879855	1.64e-09	0.00089768	36.3618
			SAS	LDL-C	rs550057	9	136146597	C	T	40472	0.185	0.06226	0.0090728	6.78e-12	0.00116219	47.0884
			SAS	LDL-C	rs174568	11	61593816	C	T	40472	0.167	-0.0678367	0.00941049	5.65e-13	0.00128231	51.9617
			SAS	LDL-C	rs11626929	14	24876237	C	T	40472	0.384	0.0414231	0.00740753	2.24e-08	0.000772055	31.2692
			SAS	LDL-C	rs12445401	16	72148419	A	G	40472	0.41	0.0499153	0.00722422	4.87e-12	0.0011782	47.738
			SAS	LDL-C	rs77265569	19	11190481	G	T	40472	0.0711	-0.150847	0.0141185	1.2e-26	0.00281267	114.15
			SAS	LDL-C	rs8112638	19	11244782	C	T	40472	0.465	0.0661884	0.00711688	1.4e-20	0.00213257	86.4894
			SAS	LDL-C	rs56255430	19	19477877	A	C	40471	0.0999	-0.0916765	0.0121401	4.3e-14	0.00140707	57.023
			SAS	LDL-C	rs1065853	19	45413233	G	T	38246	0.0349	-0.414942	0.0200596	4.68e-95	0.011064	427.866
			SAS	LDL-C	rs78736419	19	49211154	A	G	40472	0.285	0.0567341	0.00847027	2.11e-11	0.00110728	44.8614
			AFR	PCSK9	rs11206513	1	55507649	T	C	46039	0.421	-0.0416873	0.00694099	1.9e-09	0.000782886	36.07
			AFR	PCSK9	rs11591147	1	55505647	G	T	44345	0.00829	-0.485403	0.0369179	1.74e-39	0.00388326	172.867
			AFR	PCSK9	rs1165287	1	55520212	A	G	46039	0.351	-0.0669836	0.0071652	8.89e-21	0.00189466	87.3899
			AFR	PCSK9	rs11804420	1	55520445	A	G	46039	0.0578	-0.109074	0.0145983	7.92e-14	0.00121112	55.8238
			AFR	PCSK9	rs1537399	1	55536383	G	A	45601	0.0142	-0.214312	0.0289099	1.23e-13	0.00120366	54.9517
			AFR	PCSK9	rs34232196	1	55489542	C	T	46039	0.201	-0.0472124	0.00852215	3.03e-08	0.000666191	30.6899
			AFR	PCSK9	rs57357765	1	55605395	T	C	46039	0.0335	0.119009	0.0195012	1.04e-09	0.000808276	37.2407
			AFR	PCSK9	rs7523242	1	55498949	C	T	46039	0.28	0.0455502	0.00737752	6.65e-10	0.000827322	38.1189
			EAS	PCSK9	rs17111652	1	55590465	C	T	79693	0.0596	0.0762897	0.0107498	1.28e-12	0.000631592	50.364
			EAS	PCSK9	rs2094470	1	55497302	T	C	79605	0.0532	-0.0672252	0.0115611	6.07e-09	0.000424562	33.8108
			EAS	PCSK9	rs41294821	1	55513183	C	T	82587	0.0337	-0.0799557	0.0139018	8.85e-09	0.000400379	33.0785
			EAS	PCSK9	rs4927191	1	55491702	T	C	82587	0.175	-0.0592597	0.00685954	5.67e-18	0.000902869	74.6309
			EAS	PCSK9	rs572512	1	55517344	T	C	72451	0.232	-0.0653659	0.00700049	9.88e-21	0.00120193	87.1834
			EAS	PCSK9	rs6663252	1	55630151	T	C	82587	0.12	-0.0750854	0.00781761	7.64e-22	0.00111575	92.247
			EAS	PCSK9	rs7523141	1	55498798	T	C	72042	0.341	-0.0447213	0.0057337	6.2e-15	0.000843736	60.8341
			EAS	PCSK9	rs7552350	1	55518198	C	A	77212	0.0393	-0.0924267	0.0132514	3.06e-12	0.00062967	48.6475
			EUR	PCSK9	rs10493176	1	55538552	T	G	1231241	0.086	-0.0710446	0.002514	1.09e-175	0.000648197	798.603
			EUR	PCSK9	rs11206517	1	55526428	T	G	1231228	0.0371	0.0888589	0.00371072	1e-126	0.000465527	573.436
			EUR	PCSK9	rs115465289	1	55580914	G	A	1227389	0.0312	-0.0406552	0.00422364	6.23e-22	7.5482e-05	92.6526
			EUR	PCSK9	rs11810371	1	55496861	G	A	1217052	0.0428	-0.0423299	0.00367299	9.91e-31	0.000109119	132.817
			EUR	PCSK9	rs12031153	1	55601339	G	A	1221138	0.0531	0.0331403	0.00346303	1.07e-21	7.49899e-05	91.5798
			EUR	PCSK9	rs12043403	1	55431933	T	C	1220570	0.0975	-0.024476	0.00246425	3.01e-23	8.0819e-05	98.6531
			EUR	PCSK9	rs12117661	1	55487346	C	G	1227744	0.242	-0.0659791	0.00164207	1e-200	0.00131326	1614.47
			EUR	PCSK9	rs12123143	1	55453856	T	C	757074	0.229	0.0131509	0.00225602	5.57e-09	4.48815e-05	33.98
			EUR	PCSK9	rs12409233	1	55436599	G	C	1228324	0.0882	-0.0225537	0.00244129	2.5e-20	6.9479e-05	85.3485
			EUR	PCSK9	rs12732125	1	55470153	C	T	1225220	0.0188	-0.173907	0.00524615	1e-200	0.000896085	1098.88
			EUR	PCSK9	rs12739979	1	55496648	C	T	1145060	0.238	-0.0270434	0.00181243	2.4e-50	0.000194396	222.638
			EUR	PCSK9	rs137886411	1	55525722	G	A	1224261	0.01	0.052263	0.00746464	2.53e-12	4.00387e-05	49.0197
			EUR	PCSK9	rs142116310	1	55536386	G	A	1220098	0.0107	0.0554039	0.00723134	1.84e-14	4.81091e-05	58.7006
			EUR	PCSK9	rs145391209	1	55462672	G	A	1222843	0.0146	-0.0435266	0.00606828	7.35e-13	4.20716e-05	51.4491
			EUR	PCSK9	rs146273942	1	55453841	G	A	1225216	0.0205	-0.0465665	0.00506458	3.77e-20	6.8995e-05	84.5395
			EUR	PCSK9	rs146480899	1	55483477	A	G	1228206	0.0198	-0.0364734	0.005179	1.89e-12	4.03805e-05	49.5975
			EUR	PCSK9	rs150119739	1	55520938	G	A	1220506	0.0417	0.0696203	0.00363206	6.81e-82	0.000300951	367.422
			EUR	PCSK9	rs17111474	1	55479967	C	T	1157592	0.296	0.0113165	0.00163522	4.5e-12	4.13712e-05	47.8929
			EUR	PCSK9	rs17111503	1	55503448	A	G	1222825	0.256	0.0487264	0.00160687	1e-200	0.000751409	919.531
			EUR	PCSK9	rs181331606	1	55493672	C	G	1061564	0.0901	0.0286493	0.00297663	6.29e-22	8.72558e-05	92.6355
			EUR	PCSK9	rs182491400	1	55493375	C	T	1092830	0.0209	0.0444815	0.00555579	1.18e-15	5.86529e-05	64.1012
			EUR	PCSK9	rs1863668	1	55411708	G	T	1221351	0.428	-0.0103062	0.00141955	3.87e-13	4.31555e-05	52.7102
			EUR	PCSK9	rs2094470	1	55497302	T	C	1213921	0.0716	0.0212038	0.00276529	1.75e-14	4.84322e-05	58.7957
			EUR	PCSK9	rs2479396	1	55482091	A	G	1147754	0.323	-0.0114411	0.00159856	8.24e-13	4.46282e-05	51.2244
			EUR	PCSK9	rs2479410	1	55505861	G	A	1189801	0.338	-0.0413009	0.00152538	1.9e-161	0.000615774	733.098
			EUR	PCSK9	rs2495477	1	55518467	A	G	1177725	0.397	-0.0524078	0.00149171	1e-200	0.00104695	1234.3
			EUR	PCSK9	rs28385715	1	55532142	T	G	1198344	0.0229	0.0455686	0.00489729	1.34e-20	7.22448e-05	86.5803
			EUR	PCSK9	rs28775984	1	55491161	T	C	406807	0.432	-0.0192835	0.00303755	2.18e-10	9.90589e-05	40.3016
			EUR	PCSK9	rs374459115	1	55489968	G	A	1079572	0.0172	0.068345	0.006762	5.13e-24	9.46173e-05	102.156
			EUR	PCSK9	rs41294825	1	55519068	A	T	1227845	0.043	-0.0414044	0.00341298	7.2e-34	0.000119848	147.172
			EUR	PCSK9	rs41297885	1	55526840	C	G	1230153	0.0358	-0.0406301	0.00378858	7.82e-27	9.34853e-05	115.012
			EUR	PCSK9	rs530804537	1	55583210	G	A	1064964	0.0121	-0.255533	0.00718267	1e-200	0.00118706	1265.67
			EUR	PCSK9	rs55817205	1	55609056	G	A	1219855	0.0116	0.0676289	0.00712427	2.25e-21	7.38658e-05	90.1121
			EUR	PCSK9	rs572512	1	55517344	C	T	1151761	0.353	0.0211114	0.00155585	6.11e-42	0.000159833	184.119
			EUR	PCSK9	rs72660548	1	55500978	C	G	1230647	0.0202	0.0704297	0.00495026	6.19e-46	0.000164456	202.421
			EUR	PCSK9	rs72909541	1	55494301	C	T	1192943	0.047	-0.0589313	0.00344389	1.21e-65	0.000245396	292.815
			EUR	PCSK9	rs74700387	1	55510015	C	T	1225163	0.0161	-0.0416223	0.00554408	6.03e-14	4.60023e-05	56.3628
			EUR	PCSK9	rs75050571	1	55500283	A	T	1220192	0.0236	0.0282488	0.00498383	1.44e-08	2.6329e-05	32.1272
			EUR	PCSK9	rs7525503	1	55522558	G	T	1221608	0.0229	0.0712849	0.00498832	2.51e-46	0.000167141	204.214
			EUR	PCSK9	rs7546522	1	55516713	C	T	1223783	0.15	-0.0223007	0.0020161	1.93e-28	9.99689e-05	122.352
			EUR	PCSK9	rs77875082	1	55485042	G	A	1221906	0.0305	0.0538427	0.00421969	2.75e-37	0.000133228	162.814
			EUR	PCSK9	rs79494709	1	55608984	G	C	1223720	0.0491	-0.0257612	0.0032526	2.37e-15	5.12586e-05	62.7293
			EUR	PCSK9	rs80085738	1	55495299	G	A	1224683	0.0109	-0.0407151	0.00683942	2.63e-09	2.89358e-05	35.4382
			EUR	PCSK9	rs890576	1	55452897	C	G	1218375	0.202	-0.0152847	0.00174823	2.27e-18	6.27348e-05	76.4392
			EUR	PCSK9	rs9436961	1	55488831	A	T	1227691	0.259	0.0361334	0.0015865	8.01e-115	0.000422343	518.725
			HIS	PCSK9	rs11206513	1	55507649	T	C	46039	0.421	-0.0416873	0.00694099	1.9e-09	0.000782886	36.07
			HIS	PCSK9	rs11591147	1	55505647	G	T	44345	0.00829	-0.485403	0.0369179	1.74e-39	0.00388326	172.867
			HIS	PCSK9	rs1165287	1	55520212	A	G	46039	0.351	-0.0669836	0.0071652	8.89e-21	0.00189466	87.3899
			HIS	PCSK9	rs11804420	1	55520445	A	G	46039	0.0578	-0.109074	0.0145983	7.92e-14	0.00121112	55.8238
			HIS	PCSK9	rs1537399	1	55536383	G	A	45601	0.0142	-0.214312	0.0289099	1.23e-13	0.00120366	54.9517
			HIS	PCSK9	rs34232196	1	55489542	C	T	46039	0.201	-0.0472124	0.00852215	3.03e-08	0.000666191	30.6899
			HIS	PCSK9	rs57357765	1	55605395	T	C	46039	0.0335	0.119009	0.0195012	1.04e-09	0.000808276	37.2407
			HIS	PCSK9	rs7523242	1	55498949	C	T	46039	0.28	0.0455502	0.00737752	6.65e-10	0.000827322	38.1189
			SAS	PCSK9	rs693668	1	55521109	A	G	37482	0.386	-0.0512641	0.00809211	2.37e-10	0.00106959	40.131
			Notes:	F-statistic > 10 indicates genetic instrument of sufficient strength
			Abbreviations:
			SNP	names of the genetic variants (SNPs=single nucleiotide polymorphisms) included in the analysis
			BETA	associations with the downstream circulating lipid exposure (LDL-C) per additional copy of the effect allele
			SE	standard error associated with effect estimate
			P value	p-value associated with effect estimate
			R2	variance explained by instrument SNP
			F	F-statistic of instrument SNP
			EAF	effect allele frequency
			CHR	chromosome
			POSITION	base pair position HG19/GRCh37
			EFFECT ALLELE	name of the effect allele for each SNP: beta-coefficients are the associations with the exposure and outcome per additional copy of the effect allele
			OTHER ALLELE	name of the non-effect allele.

## Sheet: S3 PCSK9 GOF|LOF instruments
Table S3. Gain-of-function, loss-of-function SNPs used as instruments in sensitivity analyses
POPULATION	SNP	CHR	POS	OTHER ALLELE	EFFECT ALLELE	SAMPLE SIZE	EAF	BETA	SE	PVALUE	NOTES	R2	F-STATISTIC
HIS	rs11591147	1	55505647	G	T	44345	0.00829	-0.485403	0.0369179	1.74e-39		0.00388326	172.867
HIS	rs505151	1	55529187	A	G	46039	0.0485	0.085598	0.0156364	4.39e-08		0.000650497	29.9664
EAS	rs505151	1	55529187	A	G	82587	0.052	0.0794191	0.01141	3.39e-12	rs11591147 not found in GWAS	0.00058629	48.4471
SAS	rs11591147	1	55505647	G	T	31399	0.00129	-0.332526	0.104187	0.00141	Does not remain after clumping at LD R2 = 0.4, 0.2 or 0.001	0.000324315	10.1858
SAS	rs505151	1	55529187	A	G	40472	0.0224	0.0987012	0.0237716	3.29e-05		0.000425783	17.2388
AFR	rs11591147	1	55505647	G	T	91672	0.00273	-0.372842	0.0449288	1.05e-16	Does not remain after clumping at LD R2 = 0.4, 0.2 or 0.001	0.000750649	68.8637
AFR	rs505151	1	55529187	A	G	94623	0.261	0.103778	0.00525756	1e-86		0.00410073	389.613
EUR	rs11591147	1	55505647	G	T	1224401	0.0163	-0.433696	0.005426	1e-200		0.00519072	6388.67
EUR	rs505151	1	55529187	A	G	1228647	0.0373	0.0867875	0.00365544	1.33e-124		0.000458573	563.682
Notes: PCSK9 cis-location intruments extracted from respective population LDL-C GWAS
Notes: F-statistic > 10 indicates genetic instrument of sufficient strength
Abbreviations:
SNP	names of the genetic variants (SNPs=single nucleiotide polymorphisms) included in the analysis
BETA	associations with the downstream circulating lipid exposure (LDL-C) per additional copy of the effect allele
SE	standard error associated with effect estimate
P value	p-value associated with effect estimate
R2	variance explained by instrument SNP
F	F-statistic of instrument SNP
EAF	effect allele frequency
CHR	chromosome
POSITION	base pair position HG19/GRCh37
EFFECT ALLELE	name of the effect allele for each SNP: beta-coefficients are the associations with the exposure and outcome per additional copy of the effect allele
OTHER ALLELE	name of the non-effect allele.

## Sheet: S4 QTL PCSK9 instruments
Table S4. eQTL and pQTL PCSK9 insruments constructed using GWASs of circulating PCSK9 protein levels, pancreatic PCSK9 gene expression, and liver PCSK9 expression
PCSK9 QTL	id.exposure	SNP	chr.exposure	pos.exposure	effect_allele.exposure	other_allele.exposure	samplesize.exposure	beta.exposure	se.exposure	pval.exposure	eaf.exposure	R2	F-stat	Average R2	Average F-stat
PCSK9 protein (pQTL)	PCSK9	rs75050571	1	55034610	T	A	35362	0.1485	0.025966	1.07e-08	NA	0.000924069	32.7072
PCSK9 protein (pQTL)	PCSK9	rs11583974	1	55086045	A	G	35365	0.125	0.01912	6.26e-11	NA	0.00120711	42.741
PCSK9 protein (pQTL)	PCSK9	rs143646411	1	55091301	C	T	35365	0.1814	0.032287	1.93e-08	NA	0.000891781	31.566
PCSK9 protein (pQTL)	PCSK9	rs2495494	1	55031463	G	C	35362	-0.0828	0.017027	1.16e-06	NA	0.000668278	23.6475
PCSK9 protein (pQTL)	PCSK9	rs12136600	1	55055522	T	C	35364	-0.1108	0.014932	1.17e-13	NA	0.00155456	55.0609
PCSK9 protein (pQTL)	PCSK9	rs12043403	1	54966260	C	T	35362	-0.0634	0.012324	2.68e-07	NA	0.000747848	26.4652
PCSK9 protein (pQTL)	PCSK9	rs17192725	1	55030458	A	G	35362	0.0926	0.016413	1.68e-08	NA	0.000899329	31.8307
PCSK9 protein (pQTL)	PCSK9	rs11810371	1	55031188	A	G	35362	-0.1194	0.021502	2.81e-08	NA	0.000871236	30.8355
PCSK9 protein (pQTL)	PCSK9	rs2479408	1	55038515	G	C	35363	-0.0924	0.010929	2.81e-17	NA	0.00201724	71.4798
PCSK9 protein (pQTL)	PCSK9	rs2479409	1	55038977	A	G	35362	-0.0737	0.008934	1.6e-16	NA	0.00192075	68.0523
PCSK9 protein (pQTL)	PCSK9	rs45613943	1	55052949	C	T	35362	-0.1445	0.023943	1.59e-09	NA	0.00102895	36.4232
PCSK9 protein (pQTL)	PCSK9	rs150119739	1	55055265	A	G	35363	0.1315	0.022451	4.71e-09	NA	0.000969192	34.3068
PCSK9 protein (pQTL)	PCSK9	rs41297885	1	55061167	G	C	35364	-0.1165	0.019647	3.03e-09	NA	0.000993268	35.1608
PCSK9 protein (pQTL)	PCSK9	rs505151	1	55063514	A	G	35364	-0.2025	0.018524	8.14e-28	NA	0.00336786	119.503
PCSK9 protein (pQTL)	PCSK9	rs11591147	1	55039974	T	G	35363	-0.8924	0.038789	3.99e-117	NA	0.0147469	529.3
PCSK9 protein (pQTL)	PCSK9	rs472495	1	55055640	T	G	35364	0.1566	0.008618	8.88e-74	NA	0.00925066	330.195	0.00262869	93.7047
PCSK9 pancreas expression (eQTL)	PCSK9	rs535471	1	55048509	T	C	238	0.4	0.0789117	4e-07	NA	0.0974398	25.6943
PCSK9 pancreas expression (eQTL)	PCSK9	rs2479415	1	55033072	C	T	238	0.29	0.0649857	8.1e-06	NA	0.0772122	19.9141
PCSK9 pancreas expression (eQTL)	PCSK9	rs12563927	1	54915522	C	T	238	-0.46	0.111333	3.6e-05	NA	0.066928	17.0714	0.0805267	20.8933
PCSK9 liver expression (eQTL)	PCSK9	rs55054735	1	55054735	G	C	178	0.36	0.0721267	6e-07	NA	0.122774	24.9122	0.122774	24.9122

## Sheet: S5 Average F-statistics
Table S5. Average R2 and F-statistic information for instruments used in the study
INFORMATION	POPULATION	EXPOSURE TARGET	SUM R2	AVERAGE F-STATISTIC
LDL-C associations (primary multi-ancestry instruments)	EUR	PCSK9	0.0105982	279.014
	EUR	HMGCR	0.00516488	241.308
	EUR	LDL-C	0.061375	183.997
	HIS	PCSK9	0.0112774	64.1439
	HIS	HMGCR	0.00398292	83.1375
	HIS	LDL-C	0.0617055	113.972
	SAS	PCSK9	0.00106959	40.131
	SAS	HMGCR	0.00178159	72.228
	SAS	LDL-C	0.0393262	1574.29
	EAS	PCSK9	0.0393262	112.45
	EAS	HMGCR	0.00615049	60.0995
	EAS	LDL-C	0.0661586	109.307
	AFR	PCSK9	0.0112774	109.307
	AFR	HMGCR	0.00116897	55.3382
	AFR	LDL-C	0.0913859	151.222
Functional PCSK9 SNPs (LDL-C genetic associaitons)	HISP	PCSK9-rs11591147	0.00388326	172.867
	HISP	PCSK9-rs505151	0.000650497	29.9664
	EAS	PCSK9-rs505151	0.00058629	48.4471
	SAS	PCSK9-rs11591147	0.000324315	10.1858
	SAS	PCSK9-rs505151	0.000425783	17.2388
	AFR	PCSK9-rs11591147	0.000750649	68.8637
	AFR	PCSK9-rs505151	0.00410073	389.613
	EUR	PCSK9-rs11591147	0.00519072	6388.67
	EUR	PCSK9-rs505151	0.000458573	563.682
PCSK9 QTL	EUR	PCSK9 protein (pQTL)	0.00262869	93.7047
	EUR	PCSK9 pancreas expression (eQTL)	0.0805267	20.8933
	EUR	PCSK9 liver expression (eQTL)	0.122774	24.9122

## Sheet: S6 Drug target MR Results
Table S6. Drug-target Mendelian randomiztion on type 2 diabetes and glycemic traits
* Aligned to lowered LDL-C levels (proxying PCSK9 and HMGCR inhibition)
POPULATION	TARGET	OUTCOME	METHOD	LD R2	NSNPS	BETA*	SE	95% CI LOWER	95% CI UPPER	OR	OR 95% CI LOWER	OR 95% CI UPPER	PVALUE	INTERCEPT	SE INTERCEPT	PVALUE INTERCEPT	RSE	HET STATISTIC	HET PVALUE
AFRICAN
AFR	PCSK9	T2D	MRIVW	0.2	34	0.427836	0.189205	0.0569952	0.798677	1.53393	1.05865	2.2226	0.0237446	NA	NA	NA	1.1838	46.2457	0.0627433
AFR	PCSK9	T2D	MREGGER	0.2	34	0.198556	0.235394	-0.262816	0.659928	1.21964	0.768883	1.93465	0.398946	-0.0284524	0.0198212	0.151158	1.17039	43.8341	0.0793462
AFR	PCSK9	T2D	Maxlik	0.2	34	0.422355	0.191707	0.0466081	0.798101	1.52555	1.04771	2.22132	0.0275862	NA	NA	NA	1.18276	46.1643	0.0637384
AFR	PCSK9	HbA1c	MRIVW	0.2	38	-0.0134692	0.0440843	-0.0998744	0.0729361	NA	NA	NA	0.759961	NA	NA	NA	1.17101	50.7364	0.0656721
AFR	PCSK9	HbA1c	MREGGER	0.2	38	-0.000681631	0.0542508	-0.107013	0.10565	NA	NA	NA	0.989975	0.00164349	0.00456786	0.719002	1.18536	50.583	0.054152
AFR	PCSK9	HbA1c	Maxlik	0.2	38	-0.0209139	0.0446989	-0.108524	0.066696	NA	NA	NA	0.639868	NA	NA	NA	1.17197	50.82	0.0646719
AFR	PCSK9	FI	MRIVW	0.2	18	-0.0498529	0.0665853	-0.18036	0.0806542	NA	NA	NA	0.454033	NA	NA	NA	1.23756	26.0365	0.0737985
AFR	PCSK9	FI	MREGGER	0.2	18	-0.0758361	0.0953154	-0.262654	0.110982	NA	NA	NA	0.426245	-0.00213127	0.00602952	0.723735	1.27175	25.8776	0.0557753
AFR	PCSK9	FI	Maxlik	0.2	18	-0.0529281	0.0673814	-0.184996	0.0791395	NA	NA	NA	0.43216	NA	NA	NA	1.23785	26.0485	0.0735821
AFR	PCSK9	FG	MRIVW	0.2	18	-0.0614041	0.0390245	-0.137892	0.0150839	NA	NA	NA	0.115609	NA	NA	NA	1.01225	17.4191	0.426337
AFR	PCSK9	FG	MREGGER	0.2	18	-0.0684369	0.0621244	-0.190201	0.0533269	NA	NA	NA	0.270631	-0.000571769	0.00390722	0.883656	1.04274	17.3968	0.360379
AFR	PCSK9	FG	Maxlik	0.2	18	-0.0635361	0.0393034	-0.140571	0.0134986	NA	NA	NA	0.105975	NA	NA	NA	1.01172	17.4007	0.427555
AFR	PCSK9	2hGlu	MRIVW	0.2	18	-0.00786963	0.241622	-0.481449	0.46571	NA	NA	NA	0.974018	NA	NA	NA	0.99906	16.9681	0.456532
AFR	PCSK9	2hGlu	MREGGER	0.2	18	0.203231	0.384004	-0.549417	0.955879	NA	NA	NA	0.596638	0.0176061	0.0247762	0.47733	1.01415	16.456	0.421616
AFR	PCSK9	2hGlu	Maxlik	0.2	18	-0.00889491	0.243042	-0.485258	0.467468	NA	NA	NA	0.970805	NA	NA	NA	0.999075	16.9685	0.456499
AFR	HMGCR	T2D	MRIVW	0.2	2	0.287537	1.0012	-1.67481	2.24989	1.33314	0.187343	9.48667	0.773965	NA	NA	NA	2.63106	6.92249	0.00851182
AFR	HMGCR	T2D	Maxlik	0.2	2	0.303822	1.02438	-1.70396	2.3116	1.35503	0.181962	10.0906	0.766778	NA	NA	NA	2.63015	6.9177	0.00853466
AFR	HMGCR	HbA1c	MRIVW	0.2	3	0.217478	0.181003	-0.137288	0.572244	NA	NA	NA	0.229551	NA	NA	NA	0.634029	0.803985	0.668986
AFR	HMGCR	HbA1c	MREGGER	0.2	3	0.304036	0.558415	-0.790458	1.39853	NA	NA	NA	0.586124	0.00466871	0.0279828	0.867494	0.876201	0.767727	0.380921
AFR	HMGCR	HbA1c	Maxlik	0.2	3	0.219277	0.183088	-0.139575	0.57813	NA	NA	NA	0.231049	NA	NA	NA	0.629212	0.791817	0.673068
AFR	HMGCR	FI	MRIVW	0.2	2	0.391987	0.228295	-0.0554711	0.839445	NA	NA	NA	0.0859755	NA	NA	NA	2.44892	5.9972	0.0143286
AFR	HMGCR	FI	Maxlik	0.2	2	0.424418	0.242317	-0.0505228	0.899359	NA	NA	NA	0.0798596	NA	NA	NA	2.39723	5.7467	0.0165196
AFR	HMGCR	FG	MRIVW	0.2	2	-0.169081	0.162181	-0.486956	0.148793	NA	NA	NA	0.297157	NA	NA	NA	1.00178	1.00357	0.316449
AFR	HMGCR	FG	Maxlik	0.2	2	-0.171559	0.16476	-0.494489	0.15137	NA	NA	NA	0.297751	NA	NA	NA	0.994261	0.988555	0.320096
AFR	HMGCR	2hGlu	MRIVW	0.2	2	0.48104	1.04008	-1.55753	2.51961	NA	NA	NA	0.643722	NA	NA	NA	0.181244	0.0328494	0.856176
AFR	HMGCR	2hGlu	Maxlik	0.2	2	0.481272	1.04185	-1.56075	2.5233	NA	NA	NA	0.644124	NA	NA	NA	0.180985	0.0327555	0.856379
EAST ASIAN
EAS	PCSK9	T2D	MRIVW	0.2	8	0.0573233	0.112595	-0.163363	0.27801	1.059	0.849283	1.3205	0.610675	NA	NA	NA	1.42647	14.2438	0.0470112
EAS	PCSK9	T2D	MREGGER	0.2	8	-0.49793	0.298752	-1.08348	0.0876231	0.607787	0.338414	1.09158	0.0955735	-0.0294328	0.0151253	0.0516636	1.2572	9.48326	0.148168
EAS	PCSK9	T2D	Maxlik	0.2	8	0.0593945	0.114583	-0.165189	0.283978	1.06119	0.847733	1.3284	0.604213	NA	NA	NA	1.42554	14.2251	0.0473191
EAS	PCSK9	HbA1c	MRIVW	0.2	9	-0.0494894	0.0315221	-0.111273	0.0122939	NA	NA	NA	0.116418	NA	NA	NA	1.22275	11.9609	0.152958
EAS	PCSK9	HbA1c	MREGGER	0.2	9	0.0497376	0.0529754	-0.0540941	0.153569	NA	NA	NA	0.347791	0.00619306	0.00288036	0.0315473	1.01802	7.25462	0.402859
EAS	PCSK9	HbA1c	Maxlik	0.2	9	-0.0497421	0.0316337	-0.111744	0.01226	NA	NA	NA	0.115849	NA	NA	NA	1.21977	11.9028	0.155594
EAS	PCSK9	FI	MRIVW	0.2	8	0.0977233	0.0495465	0.000612116	0.194835	NA	NA	NA	0.0485692	NA	NA	NA	0.982186	6.75283	0.455061
EAS	PCSK9	FI	MREGGER	0.2	8	-0.0899581	0.180757	-0.444243	0.264326	NA	NA	NA	0.618714	-0.00975586	0.00899985	0.278364	0.954116	5.46203	0.486058
EAS	PCSK9	FI	Maxlik	0.2	8	0.0886423	0.0499608	-0.00928087	0.186565	NA	NA	NA	0.076024	NA	NA	NA	0.983627	6.77265	0.452929
EAS	PCSK9	FG	MRIVW	0.2	8	-0.0108295	0.0420393	-0.0932265	0.0715675	NA	NA	NA	0.796712	NA	NA	NA	0.568761	2.26442	0.943769
EAS	PCSK9	FG	MREGGER	0.2	8	0.0273687	0.243483	-0.449857	0.504595	NA	NA	NA	0.910502	0.00198242	0.0121095	0.869962	0.604295	2.19103	0.901318
EAS	PCSK9	FG	Maxlik	0.2	8	-0.0109152	0.0421524	-0.0935339	0.0717035	NA	NA	NA	0.795677	NA	NA	NA	0.568721	2.26411	0.943789
EAS	PCSK9	2hGlu	MRIVW	0.2	8	-0.407754	0.453353	-1.29633	0.480818	NA	NA	NA	0.36843	NA	NA	NA	1.35674	12.8853	0.0749536
EAS	PCSK9	2hGlu	MREGGER	0.2	8	0.777054	1.50522	-2.17318	3.72729	NA	NA	NA	0.605688	0.0588399	0.0721065	0.414492	1.41101	11.9457	0.063191
EAS	PCSK9	2hGlu	Maxlik	0.2	8	-0.423291	0.46124	-1.32732	0.48074	NA	NA	NA	0.358764	NA	NA	NA	1.35373	12.8282	0.0764072
EAS	HMGCR	T2D	MRIVW	0.2	6	0.368846	0.0541651	0.262683	0.47501	1.44607	1.30041	1.60803	9.78195e-12	NA	NA	NA	0.930407	4.32829	0.503182
EAS	HMGCR	T2D	MREGGER	0.2	6	0.292068	0.190478	-0.0812688	0.665406	1.33919	0.921946	1.94528	0.125191	-0.0058932	0.0140055	0.673918	1.01833	4.14799	0.386348
EAS	HMGCR	T2D	Maxlik	0.2	6	0.371087	0.0559053	0.261513	0.480662	1.44931	1.29889	1.61714	3.18439e-11	NA	NA	NA	0.903781	4.0841	0.537373
EAS	HMGCR	HbA1c	MRIVW	0.2	6	0.0203908	0.0228861	-0.024466	0.0652476	NA	NA	NA	0.372946	NA	NA	NA	1.23374	7.61058	0.179044
EAS	HMGCR	HbA1c	MREGGER	0.2	6	0.112241	0.0781146	-0.0408633	0.265346	NA	NA	NA	0.150752	0.00688816	0.0056553	0.223223	1.20633	5.82095	0.212925
EAS	HMGCR	HbA1c	Maxlik	0.2	6	0.0205603	0.0229827	-0.0244858	0.0656063	NA	NA	NA	0.371002	NA	NA	NA	1.23293	7.60061	0.179664
EAS	HMGCR	FI	MRIVW	0.2	3	-0.0684416	0.0408404	-0.148489	0.0116055	NA	NA	NA	0.0937711	NA	NA	NA	0.894244	1.59935	0.449476
EAS	HMGCR	FI	MREGGER	0.2	3	-0.116563	0.204045	-0.516492	0.283365	NA	NA	NA	0.567821	-0.00322705	0.0133403	0.808855	1.23573	1.52704	0.216558
EAS	HMGCR	FI	Maxlik	0.2	3	-0.0686506	0.0410109	-0.149032	0.0117306	NA	NA	NA	0.0941379	NA	NA	NA	0.891812	1.59066	0.451433
EAS	HMGCR	FG	MRIVW	0.2	3	-0.104026	0.0361742	-0.174927	-0.0331245	NA	NA	NA	0.00403139	NA	NA	NA	1.42417	4.05654	0.131563
EAS	HMGCR	FG	MREGGER	0.2	3	-0.259948	0.211539	-0.674564	0.154668	NA	NA	NA	0.21913	-0.0103919	0.0137335	0.449242	1.74805	3.05567	0.0804559
EAS	HMGCR	FG	Maxlik	0.2	3	-0.104828	0.0366019	-0.176568	-0.0330881	NA	NA	NA	0.0041833	NA	NA	NA	1.41285	3.99227	0.13586
EAS	HMGCR	2hGlu	MRIVW	0.2	3	0.0230452	0.264594	-0.495558	0.541649	NA	NA	NA	0.930595	NA	NA	NA	1.03175	2.12902	0.344897
EAS	HMGCR	2hGlu	MREGGER	0.2	3	1.54243	1.87044	-2.12362	5.20849	NA	NA	NA	0.409577	0.100844	0.121015	0.404666	0.634128	0.402118	0.525997
EAS	HMGCR	2hGlu	Maxlik	0.2	3	0.0231496	0.265134	-0.496514	0.542813	NA	NA	NA	0.930423	NA	NA	NA	1.03174	2.12898	0.344903
EUROPEAN
EUR	PCSK9	T2D	MRIVW	0.2	41	0.0142638	0.0601859	-0.1037	0.132228	1.01437	0.901495	1.14137	0.81266	NA	NA	NA	1.02264	41.8321	0.391225
EUR	PCSK9	T2D	MREGGER	0.2	41	0.00177316	0.0730582	-0.141421	0.144967	1.00177	0.868124	1.156	0.980637	-0.000824684	0.00276529	0.76553	1.03453	41.74	0.352562
EUR	PCSK9	T2D	Maxlik	0.2	41	0.0136979	0.0604036	-0.104693	0.132089	1.01379	0.900601	1.14121	0.8206	NA	NA	NA	1.02267	41.8338	0.391152
EUR	PCSK9	HbA1c	MRIVW	0.2	45	-0.00935788	0.0136339	-0.0360803	0.0173645	NA	NA	NA	0.49248	NA	NA	NA	1.03698	47.3141	0.33889
EUR	PCSK9	HbA1c	MREGGER	0.2	45	-0.0106167	0.0165784	-0.0431104	0.021877	NA	NA	NA	0.521917	-7.97155e-05	0.000612501	0.89645	1.04877	47.2963	0.301501
EUR	PCSK9	HbA1c	Maxlik	0.2	45	-0.00931775	0.01368	-0.0361305	0.017495	NA	NA	NA	0.495793	NA	NA	NA	1.03695	47.3114	0.338989
EUR	PCSK9	FI	MRIVW	0.2	45	0.00825351	0.0235286	-0.0378625	0.0543695	NA	NA	NA	0.725748	NA	NA	NA	1.22083	65.5788	0.0190573
EUR	PCSK9	FI	MREGGER	0.2	45	0.018209	0.0264588	-0.0336502	0.0700681	NA	NA	NA	0.491325	0.000625388	0.000979495	0.523161	1.23021	65.0773	0.0164592
EUR	PCSK9	FI	Maxlik	0.2	45	0.00837411	0.0236455	-0.037971	0.0547192	NA	NA	NA	0.723224	NA	NA	NA	1.22082	65.5772	0.0190635
EUR	PCSK9	FG	MRIVW	0.2	45	-0.0374195	0.0200452	-0.0767081	0.00186901	NA	NA	NA	0.0619351	NA	NA	NA	1.16282	59.4948	0.0594699
EUR	PCSK9	FG	MREGGER	0.2	45	-0.000232958	0.0217934	-0.0429479	0.042482	NA	NA	NA	0.991471	0.00238947	0.000799719	0.00280917	1.07703	49.8797	0.218676
EUR	PCSK9	FG	Maxlik	0.2	45	-0.0401426	0.0201531	-0.0796427	-0.000642523	NA	NA	NA	0.046384	NA	NA	NA	1.16315	59.5282	0.0591259
EUR	PCSK9	2hGlu	MRIVW	0.2	45	0.0499291	0.0792228	-0.105348	0.205206	NA	NA	NA	0.52854	NA	NA	NA	0.935552	38.5113	0.705214
EUR	PCSK9	2hGlu	MREGGER	0.2	45	-0.0165337	0.103732	-0.219849	0.186782	NA	NA	NA	0.873363	-0.00434286	0.00385089	0.259424	0.928047	37.0346	0.726693
EUR	PCSK9	2hGlu	Maxlik	0.2	45	0.0523746	0.0793748	-0.1032	0.207949	NA	NA	NA	0.509357	NA	NA	NA	0.93561	38.5161	0.705021
EUR	HMGCR	T2D	MRIVW	0.2	23	0.415961	0.115821	0.188952	0.64297	1.51583	1.20798	1.90212	0.00032889	NA	NA	NA	1.31008	37.7586	0.0194979
EUR	HMGCR	T2D	MREGGER	0.2	23	0.384961	0.236474	-0.0785279	0.84845	1.46956	0.924476	2.33602	0.103542	-0.00137151	0.0094313	0.884378	1.3404	37.7302	0.0138589
EUR	HMGCR	T2D	Maxlik	0.2	23	0.423144	0.116652	0.194507	0.651782	1.52675	1.21471	1.91896	0.000286277	NA	NA	NA	1.30428	37.4251	0.0212356
EUR	HMGCR	HbA1c	MRIVW	0.2	26	0.0403999	0.0199395	0.00131856	0.0794813	NA	NA	NA	0.0427517	NA	NA	NA	1.03922	26.9995	0.35591
EUR	HMGCR	HbA1c	MREGGER	0.2	26	0.123042	0.0464702	0.0319608	0.214124	NA	NA	NA	0.00810245	0.00414307	0.00211213	0.0498136	0.978544	22.9812	0.520909
EUR	HMGCR	HbA1c	Maxlik	0.2	26	0.0354884	0.0200778	-0.00386415	0.074841	NA	NA	NA	0.0771375	NA	NA	NA	1.04158	27.1223	0.349801
EUR	HMGCR	FI	MRIVW	0.2	26	0.0109981	0.0285676	-0.0449945	0.0669907	NA	NA	NA	0.700249	NA	NA	NA	1.03013	26.5292	0.379803
EUR	HMGCR	FI	MREGGER	0.2	26	0.127301	0.0656674	-0.00140656	0.25601	NA	NA	NA	0.0525524	0.00566657	0.00287709	0.0488897	0.965377	22.3669	0.55738
EUR	HMGCR	FI	Maxlik	0.2	26	0.0109703	0.0286682	-0.0452193	0.0671598	NA	NA	NA	0.701969	NA	NA	NA	1.03012	26.5286	0.379837
EUR	HMGCR	FG	MRIVW	0.2	26	0.000259485	0.0249744	-0.0486903	0.0492093	NA	NA	NA	0.99171	NA	NA	NA	1.00721	25.3616	0.442261
EUR	HMGCR	FG	MREGGER	0.2	26	0.0410502	0.0571278	-0.0709203	0.153021	NA	NA	NA	0.472407	0.00200682	0.00252764	0.427224	1.01493	24.7219	0.420999
EUR	HMGCR	FG	Maxlik	0.2	26	0.000245438	0.0250859	-0.048923	0.0494139	NA	NA	NA	0.992194	NA	NA	NA	1.00721	25.3616	0.44226
EUR	HMGCR	2hGlu	MRIVW	0.2	26	0.0876881	0.11673	-0.141104	0.31648	NA	NA	NA	0.452531	NA	NA	NA	1.02202	26.1133	0.401571
EUR	HMGCR	2hGlu	MREGGER	0.2	26	-0.293131	0.256757	-0.796375	0.210112	NA	NA	NA	0.253592	-0.0173101	0.0104115	0.0963947	0.984491	23.2613	0.504418
EUR	HMGCR	2hGlu	Maxlik	0.2	26	0.0883553	0.117237	-0.14143	0.31814	NA	NA	NA	0.451062	NA	NA	NA	1.02193	26.1085	0.401828
HISPANIC
HIS	PCSK9	T2D	MRIVW	0.2	8	0.0575156	0.123438	-0.184422	0.299454	1.0592	0.831584	1.34912	0.641252	NA	NA	NA	1.16207	9.45284	0.221758
HIS	PCSK9	T2D	MREGGER	0.2	8	0.0788793	0.161512	-0.237684	0.395443	1.08207	0.788452	1.48504	0.62528	0.00302449	0.0154822	0.845117	1.252	9.40506	0.152047
HIS	PCSK9	T2D	Maxlik	0.2	8	0.058943	0.125845	-0.187713	0.305599	1.06071	0.828852	1.35744	0.639514	NA	NA	NA	1.1616	9.44523	0.22225
HIS	PCSK9	HbA1c	MRIVW	0.2	8	-0.0285798	0.0343961	-0.0959961	0.0388365	NA	NA	NA	0.406028	NA	NA	NA	1.07448	8.08161	0.325452
HIS	PCSK9	HbA1c	MREGGER	0.2	8	-0.0247256	0.0454504	-0.113808	0.0643571	NA	NA	NA	0.586433	0.000520701	0.00400281	0.8965	1.15917	8.062	0.233596
HIS	PCSK9	HbA1c	Maxlik	0.2	8	-0.0290655	0.0347732	-0.097221	0.03909	NA	NA	NA	0.403234	NA	NA	NA	1.07333	8.06429	0.326959
HIS	PCSK9	FI	MRIVW	0.2	8	-0.0573959	0.0561865	-0.167521	0.0527295	NA	NA	NA	0.307005	NA	NA	NA	1.05468	7.78647	0.351799
HIS	PCSK9	FI	MREGGER	0.2	8	-0.0752105	0.0832808	-0.238441	0.0880199	NA	NA	NA	0.366475	-0.00189612	0.00649413	0.770306	1.1321	7.68996	0.261709
HIS	PCSK9	FI	Maxlik	0.2	8	-0.0589576	0.0568803	-0.170443	0.0525277	NA	NA	NA	0.299959	NA	NA	NA	1.05247	7.75384	0.354799
HIS	PCSK9	FG	MRIVW	0.2	8	0.0784399	0.0425506	-0.00495934	0.161839	NA	NA	NA	0.0652636	NA	NA	NA	0.991899	6.88705	0.440734
HIS	PCSK9	FG	MREGGER	0.2	8	0.15931	0.0805213	0.00148824	0.317132	NA	NA	NA	0.0478743	0.00919988	0.00654429	0.159788	0.755226	3.4222	0.75429
HIS	PCSK9	FG	Maxlik	0.2	8	0.0784073	0.0432196	-0.00630318	0.163118	NA	NA	NA	0.0696532	NA	NA	NA	0.987301	6.82334	0.447503
HIS	PCSK9	2hGlu	MRIVW	0.2	8	0.0274409	0.167675	-0.301202	0.356084	NA	NA	NA	0.870002	NA	NA	NA	0.83578	4.88969	0.673422
HIS	PCSK9	2hGlu	MREGGER	0.2	8	0.26305	0.339483	-0.402336	0.928436	NA	NA	NA	0.438425	0.0267229	0.0274038	0.329484	0.703103	2.96612	0.813087
HIS	PCSK9	2hGlu	Maxlik	0.2	8	0.0244275	0.168808	-0.306436	0.355291	NA	NA	NA	0.884943	NA	NA	NA	0.835908	4.89119	0.67324
HISPANIC
HIS	HMGCR	T2D	MRIVW	0.2	2	0.159539	0.216329	-0.264467	0.583544	1.17297	0.767615	1.79238	0.46083	NA	NA	NA	1.31133	1.71959	0.189745
HIS	HMGCR	T2D	Maxlik	0.2	2	0.161083	0.217554	-0.265323	0.587489	1.17478	0.766958	1.79946	0.459041	NA	NA	NA	1.30914	1.71385	0.190486
HIS	HMGCR	HbA1c	MRIVW	0.2	2	0.1674	0.0550775	0.0594478	0.275352	NA	NA	NA	0.00237091	NA	NA	NA	1.20844	1.46033	0.226877
HIS	HMGCR	HbA1c	Maxlik	0.2	2	0.168935	0.0571283	0.0569637	0.280907	NA	NA	NA	0.00310529	NA	NA	NA	1.16351	1.35376	0.244621
HIS	HMGCR	FI	Wald ratio	0.2	1	0.059182	0.087428	-0.112177	0.230541	NA	NA	NA	0.498455	NA	NA	NA	NA	NA	NA
HIS	HMGCR	FG	Wald ratio	0.2	1	-0.0484217	0.0726325	-0.190781	0.093938	NA	NA	NA	0.504985	NA	NA	NA	NA	NA	NA
HIS	HMGCR	2hGlu	Wald ratio	0.2	1	0.177546	0.281115	-0.373439	0.728531	NA	NA	NA	0.527662	NA	NA	NA	NA	NA	NA
SOUTH ASIAN
SAS	PCSK9	T2D	Wald ratio	0.2	1	0.126794	0.302356	-0.465823	0.719412	1.13518	0.627618	2.05323	0.674957	NA	NA	NA	NA	NA	NA
SAS	PCSK9	HbA1c	Wald ratio	0.2	1	-0.503276	0.181414	-0.858847	-0.147706	NA	NA	NA	0.00553387	NA	NA	NA	NA	NA	NA
SAS	PCSK9	FI	Wald ratio	0.2	1	-0.0136548	0.237983	-0.480102	0.452793	NA	NA	NA	0.954245	NA	NA	NA	NA	NA	NA
SAS	PCSK9	FG	Wald ratio	0.2	1	-0.0663232	0.243835	-0.544241	0.411594	NA	NA	NA	0.785622	NA	NA	NA	NA	NA	NA
SAS	HMGCR	T2D	Wald ratio	0.2	1	0.529478	0.244759	0.049751	1.00921	1.69805	1.05101	2.74342	0.0305208	NA	NA	NA	NA	NA	NA
SAS	HMGCR	HbA1c	Wald ratio	0.2	1	0.0915765	0.134867	-0.172763	0.355916	NA	NA	NA	0.49713	NA	NA	NA	NA	NA	NA
SAS	HMGCR	FI	Wald ratio	0.2	1	0.28805	0.189813	-0.0839839	0.660083	NA	NA	NA	0.129129	NA	NA	NA	NA	NA	NA
SAS	HMGCR	FG	Wald ratio	0.2	1	0.268069	0.194808	-0.113755	0.649893	NA	NA	NA	0.1688	NA	NA	NA	NA	NA	NA
Note 1. Correlated Mendelian randomization analysis aligned with PCSK9 and HMGCR inhibition (corresponding to lipid lowering effect of 1 unit standard deviation LDL-C levels (SD=38.675 mg/dL); estimated effects standardized
Abbreviations:
BETA	standardized causal point estimate
CI LOWER BOUND	lower bound for 95% confidence interval based on standard error
CI UPPER BOUND	upper bound for 95% confidence interval based on standard error
Q P VALUE	p-value associated with heterogeneity statistic (Cochran’s Q statistic):
Q	heterogeneity statistic (Cochran’s Q statistic): null hypothesis is that regression model describes the associations with the outcome with no excess heterogeneity i.e. that all genetic variants estimate the same causal parameter; rejection of the null is an indication that one or more variants may be pleiotropic
Q DF	degrees of freedom for Q statistic
NSNP	number of instrument variants used in the calculation
OR	odds ratio (for binary outcomes) change (with 95% CI) in disease risk per standard deviation decrease in the downstream circulating lipid LDL
PVALUE	p-value associated with causal point estimate
RSE	estimated residual standard error from the regression model
SE	standard error associated with causal point estimate
SNP	single nucleiotide polymorphisms

## Sheet: S7 PCSK9 GOF|LOF 
Table S7. Single variable Mendelian randomiztion of gain-of-function PCSK9 instruments on type 2 diabetes and glycemic traits
* Aligned lowered LDL-C levels (proxying PCSK9 and HMGCR inhibition)
POPULATION	EXPOSURE	ID OUTCOME	METHOD	NSNP	BETA*	SE	95% CI LOWER	95% CI UPPER	OR	OR 95% CI LOWER	OR 95% CI UPPER	PVALUE	Q	Q DF	Q PVALUE	EGGER INTERCEPT	EGGER SE	EGGER PVALUE	SNP R2 EXPOSURE	SNP R2 OUTCOME	CORRECT CAUSAL DIRECTION	STEIGER PVALUE
AFR	PCSK9|GOF|LOF	T2D	Wald ratio	1	0.534795	0.387365	-0.224441	1.29403	1.7071	0.798963	3.64746	0.167403	NA	NA	NA	NA	NA	NA	0.00410928	0.000451737	TRUE	0.00682885
EAS	PCSK9|GOF|LOF	T2D	Wald ratio	1	-0.395371	0.230423	-0.847	0.0562585	0.67343	0.428699	1.05787	0.0861901	NA	NA	NA	NA	NA	NA	0.000586487	3.54889e-05	TRUE	0.000206028
EUR	PCSK9|GOF|LOF	T2D	Inverse variance weighted	2	0.0368656	0.113567	-0.185726	0.259458	1.03755	0.830501	1.29623	0.745473	4.00133	1	0.0454644	NA	NA	NA	0.00120431	6.96063e-05	TRUE	9.46985e-11
HISP	PCSK9|GOF|LOF	T2D	Inverse variance weighted	2	0.29852	0.258868	-0.208862	0.805901	1.34786	0.811508	2.23871	0.248839	2.29755	1	0.129578	NA	NA	NA	0.00454189	0.000529552	TRUE	5.29728e-05
SAS	PCSK9|GOF|LOF	T2D	Wald ratio	1	0.436671	0.507593	-0.55821	1.43155	1.54755	0.572232	4.18519	0.389635	NA	NA	NA	NA	NA	NA	0.00042597	1.49564e-05	TRUE	0.0123172
AFR	PCSK9|GOF|LOF	2hGlu	Wald ratio	1	-0.292933	0.445181	-1.16549	0.579622	NA	NA	NA	0.510533	NA	NA	NA	NA	NA	NA	0.00410928	0.000414601	TRUE	0.100214
EAS	PCSK9|GOF|LOF	2hGlu	Wald ratio	1	-1.43542	0.915397	-3.2296	0.358755	NA	NA	NA	0.116861	NA	NA	NA	NA	NA	NA	0.000586487	0.000359118	TRUE	0.643541
EUR	PCSK9|GOF|LOF	2hGlu	Inverse variance weighted	2	0.115544	0.109072	-0.0982365	0.329325	NA	NA	NA	0.289445	2.61154	1	0.106089	NA	NA	NA	0.00120431	9.59067e-05	TRUE	6.56502e-09
HISP	PCSK9|GOF|LOF	2hGlu	Inverse variance weighted	2	0.337474	0.236931	-0.126911	0.801858	NA	NA	NA	0.154343	0.0427423	1	0.836211	NA	NA	NA	0.00454189	0.000190586	TRUE	2.28207e-07
AFR	PCSK9|GOF|LOF	FG	Wald ratio	1	0.0385438	0.0751604	-0.108771	0.185858	NA	NA	NA	0.608077	NA	NA	NA	NA	NA	NA	0.00410928	1.47297e-06	TRUE	1.74556e-13
EAS	PCSK9|GOF|LOF	FG	Wald ratio	1	-0.0503657	0.120878	-0.287286	0.186555	NA	NA	NA	0.676922	NA	NA	NA	NA	NA	NA	0.000586487	2.20057e-06	TRUE	0.000581364
EUR	PCSK9|GOF|LOF	FG	Inverse variance weighted	2	0.0142549	0.0152381	-0.0156118	0.0441215	NA	NA	NA	0.349543	0.839652	1	0.359496	NA	NA	NA	0.00120431	1.29608e-05	TRUE	2.8835e-33
HISP	PCSK9|GOF|LOF	FG	Inverse variance weighted	2	0.142014	0.06026	0.0239046	0.260124	NA	NA	NA	0.0184386	0.00201306	1	0.964213	NA	NA	NA	0.00454189	0.000419087	TRUE	1.49082e-07
SAS	PCSK9|GOF|LOF	FG	Wald ratio	1	-0.277606	0.387027	-1.03618	0.480967	NA	NA	NA	0.473203	NA	NA	NA	NA	NA	NA	0.00042597	3.35525e-05	TRUE	0.195813
AFR	PCSK9|GOF|LOF	FI	Wald ratio	1	-0.102141	0.105995	-0.309892	0.10561	NA	NA	NA	0.335228	NA	NA	NA	NA	NA	NA	0.00410928	0.000123466	TRUE	9.39933e-06
EAS	PCSK9|GOF|LOF	FI	Wald ratio	1	0.0163689	0.137247	-0.252634	0.285372	NA	NA	NA	0.905065	NA	NA	NA	NA	NA	NA	0.000586487	2.0518e-05	TRUE	0.00516203
EUR	PCSK9|GOF|LOF	FI	Inverse variance weighted	2	0.0183296	0.0167654	-0.0145306	0.0511897	NA	NA	NA	0.274263	0.0619655	1	0.803416	NA	NA	NA	0.00120431	2.88186e-05	TRUE	1.00335e-23
HISP	PCSK9|GOF|LOF	FI	Inverse variance weighted	2	-0.0805037	0.117963	-0.311712	0.150705	NA	NA	NA	0.494957	2.27886	1	0.131148	NA	NA	NA	0.00454189	0.00016985	TRUE	1.0912e-08
SAS	PCSK9|GOF|LOF	FI	Wald ratio	1	0.299895	0.371829	-0.42889	1.02868	NA	NA	NA	0.419932	NA	NA	NA	NA	NA	NA	0.00042597	7.43563e-05	TRUE	0.317345
AFR	PCSK9|GOF|LOF	HbA1c	Wald ratio	1	-0.045289	0.0925052	-0.226599	0.136021	NA	NA	NA	0.624429	NA	NA	NA	NA	NA	NA	0.00410928	0.000138838	TRUE	3.63853e-05
EAS	PCSK9|GOF|LOF	HbA1c	Wald ratio	1	-0.0491066	0.0831034	-0.211989	0.113776	NA	NA	NA	0.554581	NA	NA	NA	NA	NA	NA	0.000586487	9.30285e-06	TRUE	0.00143136
EUR	PCSK9|GOF|LOF	HbA1c	Inverse variance weighted	2	0.00458998	0.0116661	-0.0182756	0.0274556	NA	NA	NA	0.693991	0.797393	1	0.371874	NA	NA	NA	0.00120431	2.69626e-06	TRUE	5.71349e-29
HISP	PCSK9|GOF|LOF	HbA1c	Inverse variance weighted	2	-0.0301178	0.0449094	-0.11814	0.0579047	NA	NA	NA	0.502453	0.0739221	1	0.785709	NA	NA	NA	0.00454189	5.4864e-05	TRUE	2.63458e-10
SAS	PCSK9|GOF|LOF	HbA1c	Wald ratio	1	0.570408	0.280645	0.0203442	1.12047	NA	NA	NA	0.042104	NA	NA	NA	NA	NA	NA	0.00042597	0.000324539	TRUE	0.817725
EUR	PCSK9|GOF|LOF	Insulin fold change	Inverse variance weighted	2	0.135005	0.0491373	0.0386958	0.231314	NA	NA	NA	0.0060051	0.0262793	1	0.87122	NA	NA	NA	0.00120431	0.000141753	TRUE	2.81538e-07
EUR	PCSK9|GOF|LOF	Stumvoll insulin sensitivity	Inverse variance weighted	2	-0.101864	0.0493439	-0.198578	-0.00514952	NA	NA	NA	0.0389836	0.141617	1	0.706679	NA	NA	NA	0.00120431	8.18208e-05	TRUE	6.67837e-09
Abbreviations:
BETA	standardized causal point estimate
CI LOWER BOUND	lower bound for 95% confidence interval based on standard error
CI UPPER BOUND	upper bound for 95% confidence interval based on standard error
Q P VALUE	p-value associated with heterogeneity statistic (Cochran’s Q statistic):
Q	heterogeneity statistic (Cochran’s Q statistic): null hypothesis is that regression model describes the associations with the outcome with no excess heterogeneity i.e. that all genetic variants estimate the same causal parameter; rejection of the null is an indication that one or more variants may be pleiotropic
Q DF	degrees of freedom for Q statistic
NSNP	number of instrument variants used in the calculation
OR	odds ratio (for binary outcomes) change (with 95% CI) in disease risk per standard deviation decrease in the downstream circulating lipid LDL
PVALUE	p-value associated with causal point estimate
RSE	estimated residual standard error from the regression model
SE	standard error associated with causal point estimate
SNP	single nucleiotide polymorphisms

## Sheet: S8 Colocalization
Table S8. ABF and SuSiE colocalization for ancestry specific PCSK9 and HMGCR drug target MR estimates surpassing P-value threshold 0.05
See https://chr1swallace.github.io/coloc/reference/index.html#coloc-data-structure
			ABF coloc												SuSiE coloc
			Trait 1	Trait 2	NSNPs	PP.H0.abf	PP.H1.abf	PP.H2.abf	PP.H3.abf	PP.H4.abf	Ratio				Trait 1	Trait 2	NSNPs*	Hit 1	Hit 2	PP.H0.abf	PP.H1.abf	PP.H2.abf	PP.H3.abf	PP.H4.abf
Trait 2 ID	Trait 2		HMGCR-EAS	FG-EAS	834	2.33e-53	0.935	8.67e-55	0.0348	0.0305	0.467075				HMGCR-EUR	T2D-EUR	486	rs12916	rs4704202	0	0.536934	0	0.431407	0.0316582
T2D	Type 2 Diabetes																486	rs181728687	rs4704202	2.22976e-48	0.554367	1.79179e-48	0.445479	0.000153909
FI	Fasting insulin		PCSK9-EAS	FI-EAS	960	6.1e-40	0.913	2.69e-41	0.0401	0.0466	0.537486						486	rs7715608	rs4704202	0.0228717	0.531265	0.0183792	0.426913	0.000570995
FG	Fasting glucose																486	rs11741997	rs4704202	0.12962	0.424765	0.10416	0.341333	0.000120586
HbA1c	Glycated hemoglobin		HMGCR-SAS	FI-SAS	817	6.21e-12	0.961	1.82e-13	0.0282	0.0106	0.273196						486	rs142550951	rs4704202	6.90558e-09	0.55429	5.54919e-09	0.445417	0.000292587
																	486	rs142156764	rs4704202	0.54226	0.012164	0.43575	0.00977465	5.05775e-05
Ancestry ID	Ancestry		HMGCR-EUR	HbA1c-EUR	1818	0	0.849	0	0.141	0.0101	0.0668432						486	rs7702895	rs4704202	1.82341e-43	0.131677	1.46526e-43	0.104285	0.764037
EUR	European																486	rs12659331	rs4704202	4.63641e-42	0.554147	3.72574e-42	0.445301	0.000552548
SAS	South Asian		HMGCR-HIS	HbA1c-HIS	1378	6.25e-21	0.819	6.39e-22	0.0836	0.0976	0.538631						486	rs62366598	rs4704202	0.544206	0.0101707	0.437314	0.00817274	0.000135849
EAS	East Asian
HIS	Hispanic		PCSK9-SAS	HbA1c-SAS	1089	0.000112	0.695	8.11e-06	0.0501	0.254	0.835252
AA	African and African-American														Notes. SuSiE coloc: Using SuSiE to relax the single causal variant assumption; SNP priors: P1=1e-04, P2=1e-04, P12=5e-06; SNPs filtered through respective ancestry-specific reference to construct LD matrices required for analyses.
			HMGCR-SAS	T2D-SAS	554	8.46e-13	0.0985	7.63e-13	0.0881	0.813	NA
			HMGCR-EUR	T2D-EUR	746	0	0.0016	0	0.984	0.0145	NA
			HMGCR-EAS	T2D-EAS	581	5.01e-54	0.167	4.53e-54	0.15	0.682	NA
			PCSK9-AA	T2D-AA	1102	1.33e-175	0.882	1.28e-176	0.085	0.0327	0.277825
			Notes. ABF coloc: Approximate Bayes Factor colocalisation analysis under a single causal variant assumption; SNP priors: P1=1e-04, P2=1e-04, P12=1e-05

## Sheet: S9 MVMR EAS
Table S9. Eastern ancestry multivariable MR of PCSK9 and HMGCR cis-instruments in LDL-C and BMI
				MODEL	ID Outcome	NSNP	ID MV Exposure	Est	SE	CI Lower	CI Upper	Pvalue	Het Statistic	Het Pvalue
MRC-IEU ID	ID Outcome	Outcome		MRMVIVW-correlated	2hGlu	3	cis-HMGCR-LDLC	-2.86238	1.90026	-6.58689	0.862127	0.131987	0.319333	0.572009
GCST9002226	2hGlu	2-hr glucose challenge					cis-HMGCR-BMI	-0.0362015	0.0244044	-0.0840341	0.011631	0.137967
GCST9002231	FG	Fasting glucose		MRMVIVW-correlated	FG	3	cis-HMGCR-LDLC	0.555231	0.265453	0.0349437	1.07552	0.0364709	0.899013	0.343046
GCST9002237	FI	Fasting insulin					cis-HMGCR-BMI	0.00606031	0.00339868	-0.00060111	0.0127217	0.0745644
GCST9002243	HbA1c	Glycated hemoglobin		MRMVIVW-correlated	FI	3	cis-HMGCR-LDLC	0.316527	0.304688	-0.280661	0.913715	0.298872	1.03473	0.30905
							cis-HMGCR-BMI	0.00348024	0.00391836	-0.00419975	0.0111602	0.37444
				MRMVIVW-correlated	HbA1c	3	cis-HMGCR-LDLC	0.096061	0.176542	-0.249961	0.442083	0.586354	1.77236	0.183091
							cis-HMGCR-BMI	0.00154065	0.00226876	-0.00290612	0.00598741	0.497093
				MRMVIVW-correlated	2hGlu	7	cis-PCSK9-LDLC	-0.214604	0.675548	-1.53868	1.10947	0.750733	9.59773	0.0874694
							cis-PCSK9-BMI	0.0101282	0.0215692	-0.0321475	0.0524039	0.638665
				MVMREgger-corrrelated	2hGlu	7	cis-PCSK9-LDLC	2.28336	2.59993	-2.8125	7.37922	0.379815	7.69346	0.103475
							cis-PCSK9-BMI	0.0238127	0.0255988	-0.026361	0.0739864	0.352255
							Intercept	-0.164348	0.165169	-0.48808	0.159384	0.319724
				MRMVIVW-correlated	FG	7	cis-PCSK9-LDLC	-0.00847537	0.0573654	-0.120912	0.103961	0.882545	4.79084	0.441936
							cis-PCSK9-BMI	-0.000270518	0.00143536	-0.00308383	0.00254279	0.850511
				MVMREgger-corrrelated	FG	7	cis-PCSK9-LDLC	-0.0714504	0.243969	-0.549629	0.406728	0.769624	4.70698	0.318706
							cis-PCSK9-BMI	-0.000524242	0.0018242	-0.00409968	0.0030512	0.77382
							Intercept	0.00388659	0.0145588	-0.0246487	0.0324219	0.789502
				MRMVIVW-correlated	FI	7	cis-PCSK9-LDLC	-0.0593223	0.0677812	-0.192173	0.073529	0.381464	5.22582	0.388947
							cis-PCSK9-BMI	0.00127535	0.00171489	-0.00208584	0.00463654	0.457063
				MVMREgger-corrrelated	FI	7	cis-PCSK9-LDLC	0.452418	0.258369	-0.0539857	0.958821	0.079937	1.02629	0.905784
							cis-PCSK9-BMI	0.00333304	0.00195499	-0.000498746	0.00716483	0.0882157
							Intercept	-0.0316869	0.0154625	-0.0619934	-0.00138043	0.0404351
				MRMVIVW-correlated	HbA1c	6	cis-PCSK9-LDLC	0.0638112	0.0405913	-0.0157478	0.14337	0.115941	2.42107	0.658823
							cis-PCSK9-BMI	0.000379835	0.0012042	-0.00198039	0.00274006	0.752438
				MVMREgger-corrrelated	HbA1c	6	cis-PCSK9-LDLC	0.244263	0.154477	-0.0585114	0.547037	0.113826	0.955288	0.812069
							cis-PCSK9-BMI	0.00134414	0.00144377	-0.00148566	0.00417394	0.351859
							Intercept	-0.0114844	0.00948584	-0.0300767	0.0071078	0.226013
				MRMVIVW	2hGlu	178	polygenic-LDLC	0.127222	0.137424	-0.14213	0.396574	0.354571	252.474	0.00013865
							polygenic-BMI	-0.00158575	0.000478999	-0.00252459	-0.000646911	0.000931135
				MVMREgger	2hGlu	178	polygenic-LDLC	-0.0554489	0.160141	-0.369324	0.258426	0.729154	245.911	0.000327392
							polygenic-BMI	-0.00173877	0.000479341	-0.00267828	-0.000799264	0.000286265
							Intercept	0.00875731	0.00405239	0.00081462	0.0167	0.0306936
				MVMRMedian	2hGlu	178	polygenic-LDLC	0.02581	0.189276	-0.345171	0.396791	0.891535	252.474	0.00013865
							polygenic-BMI	-0.00141233	0.000613617	-0.00261501	-0.000209637	0.0213554
				MVMRLasso	2hGlu	167	polygenic-LDLC	0.104277	0.115546	-0.122192	0.330747	0.366804		0.163876
							polygenic-BMI	-0.0011393	0.00042349	-0.00196934	-0.000309261	0.00713943
				MRMVIVW	FG	184	polygenic-LDLC	0.0158087	0.0171784	-0.0178611	0.0494784	0.357436	308.345	1.45972e-08
							polygenic-BMI	-0.000329512	6.70359e-05	-0.000460902	-0.000198122	8.85759e-07
				MVMREgger	FG	184	polygenic-LDLC	0.00232649	0.0197097	-0.0363045	0.0409575	0.906038	305.115	2.20238e-08
							polygenic-BMI	-0.000344532	6.77423e-05	-0.000477307	-0.000211757	3.6585e-07
							Intercept	0.000776023	0.000560579	-0.000322712	0.00187476	0.166259
				MVMRMedian	FG	184	polygenic-LDLC	0.0362817	0.021902	-0.00664623	0.0792096	0.0976111	308.345	1.45972e-08
							polygenic-BMI	-0.000253984	7.90582e-05	-0.000408938	-9.90302e-05	0.00131528
				MVMRLasso	FG	174	polygenic-LDLC	0.0064927	0.013831	-0.0206161	0.0336015	0.638762		0.208824
							polygenic-BMI	-0.000202336	5.36003e-05	-0.000307392	-9.7279e-05	0.000160075
				MRMVIVW	FI	183	polygenic-LDLC	-0.00516883	0.0198806	-0.0441347	0.0337971	0.794868	299.607	6.94264e-08
							polygenic-BMI	-4.44307e-05	7.68171e-05	-0.000194992	0.000106131	0.562997
				MVMREgger	FI	183	polygenic-LDLC	0.00183007	0.022998	-0.043246	0.0469061	0.936575	298.992	6.05681e-08
							polygenic-BMI	-3.70607e-05	7.78984e-05	-0.000189742	0.00011562	0.634247
							Intercept	-0.000394172	0.00064777	-0.0016638	0.000875457	0.542852
				MVMRMedian	FI	183	polygenic-LDLC	-0.0033869	0.0233597	-0.049172	0.0423982	0.88472	299.607	6.94264e-08
							polygenic-BMI	-0.000172212	9.18099e-05	-0.000352159	7.73536e-06	0.0606902
				MVMRLasso	FI	163	polygenic-LDLC	-0.0108525	0.0156029	-0.0414342	0.0197292	0.486715		0.151977
							polygenic-BMI	-3.84128e-05	6.46011e-05	-0.000165031	8.82052e-05	0.5521
				MRMVIVW	HbA1c	184	polygenic-LDLC	0.0478315	0.0144836	0.0194436	0.0762194	0.000958429	483.689	3.27424e-29
							polygenic-BMI	1.60837e-05	5.61623e-05	-9.39945e-05	0.000126162	0.774588
				MVMREgger	HbA1c	184	polygenic-LDLC	0.0196154	0.01619	-0.012117	0.0513477	0.225676	452.865	2.82417e-25
							polygenic-BMI	-1.39544e-05	5.51611e-05	-0.00012207	9.41614e-05	0.800288
							Intercept	0.00160042	0.000455968	0.000706726	0.00249412	0.000448195
				MVMRMedian	HbA1c	184	polygenic-LDLC	0.0616613	0.0158018	0.0306898	0.0926328	9.53317e-05	483.689	3.27424e-29
							polygenic-BMI	0.000106373	5.60065e-05	-3.39942e-06	0.000216146	0.0575246
				MVMRLasso	HbA1c	158	polygenic-LDLC	0.0178813	0.00956583	-0.000867748	0.0366303	0.0615829		0.152369
							polygenic-BMI	0.000105565	3.82843e-05	3.05282e-05	0.000180603	0.00582619

## Sheet: S10 MVMR SAS
Table S10. South Asian ancestry multivariable MR of PCSK9 and HMGCR cis-instruments in LDL-C and BMI
				MODEL	ID Outcome	NSNP	ID MV Exposure	Est	SE	CI Lower	CI Upper	Pvalue	Het Statistic	Het Pvalue
MRC-IEU ID	ID Outcome	Outcome		MRMVIVW	FG	14	polygenic-LDLC	-0.0875793	0.0539922	-0.193404	0.0182455	0.104788	16.4614	0.171003
NA	2hGlu	2-hr glucose challenge					polygenic-BMI	0.262403	0.248661	-0.224972	0.749778	0.291304
GCST9002234	FG	Fasting glucose		MVMREgger	FG	14	polygenic-LDLC	-0.0667109	0.11219	-0.286603	0.153181	0.552094	16.3926	0.127172
GCST9002240	FI	Fasting insulin					polygenic-BMI	0.279818	0.271535	-0.25239	0.812027	0.302773
GCST9002245	HbA1c	Glycated hemoglobin					Intercept	-0.00207328	0.00964244	-0.0209725	0.0168259	0.829755
				MVMRMedian	FG	14	polygenic-LDLC	-0.0662838	0.0737448	-0.210824	0.0782559	0.368744	16.4614	0.171003
							polygenic-BMI	0.40956	0.328267	-0.233844	1.05296	0.212162
				MVMRLasso	FG	12	polygenic-LDLC	-0.0920901	0.0557929	-0.201444	0.017264	0.0988265		0.70304
							polygenic-BMI	0.259089	0.341626	-0.410499	0.928677	0.448213
										0	0
				MRMVIVW	FI	14	polygenic-LDLC	-0.118225	0.0452609	-0.206936	-0.0295131	0.0089997	10.359	0.584493
							polygenic-BMI	-0.237653	0.20721	-0.643785	0.168479	0.251415
				MVMREgger	FI	14	polygenic-LDLC	-0.0801301	0.090458	-0.257428	0.0971675	0.375711	10.1225	0.519406
							polygenic-BMI	-0.20655	0.216853	-0.631582	0.218483	0.340851
							Intercept	-0.00376443	0.0077395	-0.0189339	0.011405	0.626689
				MVMRMedian	FI	14	polygenic-LDLC	-0.132176	0.0655277	-0.26061	-0.00374166	0.043685	10.359	0.584493
							polygenic-BMI	0.118649	0.267387	-0.40543	0.642727	0.657235
				MVMRLasso	FI	14	polygenic-LDLC	-0.118225	0.0452609	-0.206936	-0.0295131	0.0089997		0.514336
							polygenic-BMI	-0.237653	0.20721	-0.643785	0.168479	0.251415
										0	0
				MRMVIVW	HbA1c	14	polygenic-LDLC	0.0522297	0.044365	-0.0347257	0.139185	0.239087	21.2281	0.0471385
							polygenic-BMI	0.369014	0.204213	-0.0312437	0.769272	0.0707615
				MVMREgger	HbA1c	14	polygenic-LDLC	-0.0141879	0.0896715	-0.189944	0.161568	0.874282	19.9039	0.0466765
							polygenic-BMI	0.318875	0.214689	-0.101915	0.739666	0.137467
							Intercept	0.00655445	0.00766178	-0.00846263	0.0215715	0.392289
				MVMRMedian	HbA1c	14	polygenic-LDLC	-0.0110563	0.0524813	-0.11392	0.0918071	0.833144	21.2281	0.0471385
							polygenic-BMI	0.244932	0.198417	-0.143965	0.633829	0.217043
				MVMRLasso	HbA1c	12	polygenic-LDLC	0.0120489	0.0346667	-0.0558979	0.0799956	0.728169		0.709554
							polygenic-BMI	0.293546	0.15685	-0.0138804	0.600972	0.0612751
				Notes. MVMR requires at least 2 variants for analysis with 2 exposures; only 1 variant satisfying selection criteria available for cis-HMGCR and cis-PCSK9 (in LDLC) and none in BMI, thus MVMR NA; polygenic-LDLC and BMI analyses only here included.

[truncated: 6 more sheets: S11 MVMR AFR, S12 MVMR HIS, S13 MVMR EUR, S14 ISI and IFC Results, S15 PCSK9 QTL Results, S16 Polygenic LDL Results]
